# Supplementary material
Source: PubMed Central journal article supplement (PMC3524400)
Supplement: NIHMS398100-supplement-01.pdf [file NIHMS398100-supplement-01.pdf]

# **Appendix**

## **Table of Content**

### **Appendix 1**

UMLS Semantic Types used to filter the Eligibility Criteria CDEs

Page 2

### **Appendix 2**

Manual Evaluation of the Machine-powered CDEs for the Cardiovascular Disease Trials

Page 3

### **Appendix 3**

Manual Evaluation of the Machine-powered CDEs for the Breast Cancer Trials

Page 21

### **Appendix 4**

Comparison between the ACCF/AHA and the Machine-powered CDEs of the Cardiovascular Disease Trials

Page 43

## Appendix 1

### UMLS Semantic Types used to filter the Eligibility Criteria CDEs

|                                      |                                  |
|--------------------------------------|----------------------------------|
| Clinical Attribute                   | Body Location or Region          |
| Group Attribute                      | Disease or Syndrome              |
| Laboratory Procedure                 | Pathologic Function              |
| Diagnostic Procedure                 | Congenital Abnormality           |
| Body Substance                       | Mental or Behavioral Dysfunction |
| Laboratory or Test Result            | Mental Process                   |
| Receptor                             | Sign or Symptom                  |
| Pharmacologic Substance              | Acquired Abnormality             |
| Biologically Active Substance        | Injury or Poisoning              |
| Antibiotic                           | Neoplastic Process               |
| Enzyme                               | Finding                          |
| Clinical Drug                        | Classification                   |
| Hazardous or Poisonous Substance     | Virus                            |
| Chemical Viewed Functionally         | Ethnicity                        |
| Inorganic Chemical                   | Behavior Problem                 |
| Organic Chemical                     | Bedtime                          |
| Organism Attribute                   | Exercise                         |
| Population Group                     | Age Group                        |
| Family Group                         | Family Group                     |
| Therapeutic or Preventive Procedure  | Medical Device                   |
| Health Care Activity                 | Geographic Area                  |
| Organism Function                    | Allergy                          |
| Organ or Tissue Function             | Individual Behavior              |
| Body Part, Organ, or Organ Component | Regulation or Law                |

## Appendix 2

### Manual Evaluation of the Machine-powered CDEs for the Cardiovascular Disease Trials

| <b>CDE ID</b> | <b>Human-based CDEs</b> | <b>Machine-powered CDEs</b> |
|---------------|-------------------------|-----------------------------|
| 1             | thrombus                | thrombus                    |
| 2             | age                     | age                         |
| 3             | old                     | old                         |
| 4             | adult                   | adult                       |
| 5             | child                   | child                       |
| 6             | intolerance             | intolerance                 |
| 7             | smoke                   | smoke                       |
| 8             | smoker                  | smoker                      |
| 9             | pai                     | pai                         |
| 10            | ldl                     | ldl                         |
| 11            | triglyceride            | triglyceride                |
| 12            | cholesterol             | cholesterol                 |
| 13            | ldl_cholesterol         | ldl_cholesterol             |
| 14            | creatinine              | creatinine                  |
| 15            | hdl                     | hdl                         |
| 16            | hdl_cholesterol         | hdl_cholesterol             |
| 17            | troponin                | troponin                    |
| 18            | hemoglobin              | hemoglobin                  |
| 19            | abp                     | abp                         |
| 20            | component               | component                   |
| 21            | lipoprotein_cholesterol |                             |
| 22            | hbpm                    | hbpm                        |
| 23            | low_density_lipoprotein |                             |
| 24            | roc                     |                             |
| 25            | waist                   | waist                       |
| 26            | chest                   | chest                       |
| 27            | wrist                   | wrist                       |
| 28            | elbow                   |                             |
| 29            | avf                     | avf                         |
| 30            | target_vessel           | target_vessel               |
| 31            | leg                     | leg                         |
| 32            | location                | location                    |
| 33            | subcortical             | subcortical                 |
| 34            | intracranial            | intracranial                |
| 35            | shoulder                |                             |
| 36            | abdominal               | abdominal                   |
| 37            | lower_extremity         | lower_extremity             |
| 38            | finger                  |                             |
| 39            | left_pectoral_region    | left_pectoral_region        |
| 40            | ankle                   | ankle                       |

|    |                                               |                                               |
|----|-----------------------------------------------|-----------------------------------------------|
| 41 | head                                          | head                                          |
| 42 | blood                                         | blood                                         |
| 43 | serum                                         | serum                                         |
| 44 | right                                         |                                               |
| 45 | plasma                                        | plasma                                        |
| 46 | urine                                         | urine                                         |
| 47 | fluid                                         | fluid                                         |
| 48 | blood_glucose                                 | blood_glucose                                 |
| 49 | cell                                          |                                               |
| 50 | platelet                                      | platelet                                      |
| 51 | nyha                                          | nyha                                          |
| 52 | classification                                | classification                                |
| 53 | class                                         | class                                         |
| 54 | grade                                         | grade                                         |
| 55 | class_ii                                      | class_ii                                      |
| 56 | nyha_class_iii                                | nyha_class_iii                                |
| 57 | class_iii                                     | class_iii                                     |
| 58 | stage_i                                       | stage_i                                       |
| 59 | class_i                                       | class_i                                       |
| 60 | stage_ii                                      | stage_ii                                      |
| 61 | new_york_heart_association_classification_ii  | new_york_heart_association_classification_ii  |
| 62 | new_york_heart_association_classification_iii | new_york_heart_association_classification_iii |
| 63 | grade_i                                       | grade_i                                       |
| 64 | systolic_blood_pressure                       | systolic_blood_pressure                       |
| 65 | diastolic_blood_pressure                      | diastolic_blood_pressure                      |
| 66 | bp                                            | bp                                            |
| 67 | blood_pressure                                | blood_pressure                                |
| 68 | diastolic                                     | diastolic                                     |
| 69 | mri                                           | mri                                           |
| 70 | bmi                                           | bmi                                           |
| 71 | height                                        | height                                        |
| 72 | stage                                         | stage                                         |
| 73 | weight                                        | weight                                        |
| 74 | body_mass_index                               | body_mass_index                               |
| 75 | heart_rate                                    | heart_rate                                    |
| 76 | body_weight                                   | body_weight                                   |
| 77 | thrombolysis                                  | thrombolysis                                  |
| 78 | diastolic_pressure                            | diastolic_pressure                            |
| 79 | waist_circumference                           | waist_circumference                           |
| 80 | systolic_pressure                             | systolic_pressure                             |
| 81 | weigh                                         |                                               |
| 82 | pr_interval                                   | pr_interval                                   |
| 83 | wall_motion                                   | wall_motion                                   |
| 84 | end_diastolic                                 | end_diastolic                                 |

|     |                                      |                                      |
|-----|--------------------------------------|--------------------------------------|
| 85  | qrs_interval                         | qrs_interval                         |
| 86  | ideal_body_weight                    | ideal_body_weight                    |
| 87  | ecg                                  | ecg                                  |
| 88  | diagnose                             | diagnose                             |
| 89  | echocardiography                     | echocardiography                     |
| 90  | coronary_angiography                 | coronary_angiography                 |
| 91  | clinical_diagnosis                   | clinical_diagnosis                   |
| 92  | angiography                          | angiography                          |
| 93  | electrocardiogram                    | electrocardiogram                    |
| 94  | echocardiogram                       | echocardiogram                       |
| 95  | angiographic                         |                                      |
| 96  | assessment                           | assessment                           |
| 97  | ct_scan                              | ct_scan                              |
| 98  | angiogram                            | angiogram                            |
| 99  | stress_test                          | stress_test                          |
| 100 | spect                                | spect                                |
| 101 | angiographically                     |                                      |
| 102 | gfr                                  | gfr                                  |
| 103 | scan                                 |                                      |
| 104 | ambulatory_blood_pressure_monitoring | ambulatory_blood_pressure_monitoring |
| 105 | muga                                 | muga                                 |
| 106 | computed_tomography                  |                                      |
| 107 | contrast_ventriculography            | contrast_ventriculography            |
| 108 | mri_scan                             | mri_scan                             |
| 109 | mra                                  | mra                                  |
| 110 | cardiac_biopsy                       | cardiac_biopsy                       |
| 111 | echocardiographic                    |                                      |
| 112 | physical_exam                        | physical_exam                        |
| 113 | ct_angiography                       | ct_angiography                       |
| 114 | diagnostic_catheterization           |                                      |
| 115 | exercise_stress_test                 |                                      |
| 116 | blood_pressure_measurements          |                                      |
| 117 | magnetic_resonance_angiography       |                                      |
| 118 | transthoracic_echocardiography       |                                      |
| 119 | brain_imaging                        | brain_imaging                        |
| 120 | ekg                                  | ekg                                  |
| 121 | myocardial_perfusion_imaging         | myocardial_perfusion_imaging         |
| 122 | cardiac_ct                           | cardiac_ct                           |
| 123 | bone_marrow_aspiration               | bone_marrow_aspiration               |
| 124 | radionuclide_angiography             | radionuclide_angiography             |
| 125 | average_systolic_blood_pressure      | average_systolic_blood_pressure      |
| 126 | ventriculography                     | ventriculography                     |
| 127 | flair                                | flair                                |
| 128 | neurological_examination             | neurological_examination             |

|     |                             |                             |
|-----|-----------------------------|-----------------------------|
| 129 | brain_mri                   | brain_mri                   |
| 130 | hypertension                | hypertension                |
| 131 | stroke                      | stroke                      |
| 132 | heart_failure               | heart_failure               |
| 133 | icd                         | icd                         |
| 134 | essential_hypertension      | essential_hypertension      |
| 135 | hypertensive                | hypertensive                |
| 136 | ischemia                    | ischemia                    |
| 137 | ischemic_stroke             | ischemic_stroke             |
| 138 | acute_myocardial_infarction | acute_myocardial_infarction |
| 139 | myocardial_infarction       | myocardial_infarction       |
| 140 | diabetes                    | diabetes                    |
| 141 | coronary_artery_disease     | coronary_artery_disease     |
| 142 | disease                     | disease                     |
| 143 | diabetic                    | diabetic                    |
| 144 | unstable_angina_pectoris    | unstable_angina_pectoris    |
| 145 | diabetes_mellitus           | diabetes_mellitus           |
| 146 | ami                         | ami                         |
| 147 | angina_pectoris             | angina_pectoris             |
| 148 | angina                      | angina                      |
| 149 | anterior                    | anterior                    |
| 150 | high_blood_pressure         | high_blood_pressure         |
| 151 | left_bundle_branch_block    | left_bundle_branch_block    |
| 152 | chd                         | chd                         |
| 153 | congestive_heart_failure    | congestive_heart_failure    |
| 154 | ischemic_heart_disease      | ischemic_heart_disease      |
| 155 | unstable_angina             | unstable_angina             |
| 156 | cad                         | cad                         |
| 157 | chronic_heart_failure       | chronic_heart_failure       |
| 158 | chf                         | chf                         |
| 159 | cardiomyopathy              | cardiomyopathy              |
| 160 | stable_angina_pectoris      | stable_angina_pectoris      |
| 161 | dyslipidemia                | dyslipidemia                |
| 162 | cardiovascular_disease      | cardiovascular_disease      |
| 163 | coronary_heart_disease      | coronary_heart_disease      |
| 164 | chronic_kidney_disease      | chronic_kidney_disease      |
| 165 | systolic_hypertension       | systolic_hypertension       |
| 166 | transient_ischemic_attack   | transient_ischemic_attack   |
| 167 | hypercholesterolemia        | hypercholesterolemia        |
| 168 | abnormality                 | abnormality                 |
| 169 | deficit                     |                             |
| 170 | myocardial_ischemia         |                             |
| 171 | kidney_disease              |                             |
| 172 | stable_angina               |                             |
| 173 | ischemic_cardiomyopathy     |                             |
| 174 | metabolic_syndrome          | metabolic_syndrome          |

|     |                                      |                                      |
|-----|--------------------------------------|--------------------------------------|
| 175 | ventricular_fibrillation             | ventricular_fibrillation             |
| 176 | sustained_ventricular_tachycardia    | sustained_ventricular_tachycardia    |
| 177 | left_ventricular_hypertrophy         | left_ventricular_hypertrophy         |
| 178 | blind                                | blind                                |
| 179 | acute_coronary_syndrome              | acute_coronary_syndrome              |
| 180 | lbbb                                 | lbbb                                 |
| 181 | dilated_cardiomyopathy               | dilated_cardiomyopathy               |
| 182 | heart_disease                        | heart_disease                        |
| 183 | hemiparesis                          | hemiparesis                          |
| 184 | primary_hypertension                 | primary_hypertension                 |
| 185 | primary_hypercholesterolemia         | primary_hypercholesterolemia         |
| 186 | impairment                           | impairment                           |
| 187 | cerebral_infarction                  | cerebral_infarction                  |
| 188 | posterior                            |                                      |
| 189 | acute_anterior_myocardial_infarction | acute_anterior_myocardial_infarction |
| 190 | impaired_glucose_tolerance           | impaired_glucose_tolerance           |
| 191 | hyperlipidemia                       | hyperlipidemia                       |
| 192 | lvh                                  | lvh                                  |
| 193 | nstemi                               |                                      |
| 194 | subarachnoid_hemorrhage              |                                      |
| 195 | lv_hypertrophy                       | lv_hypertrophy                       |
| 196 | ihd                                  |                                      |
| 197 | microalbuminuria                     |                                      |
| 198 | chronic_renal_insufficiency          | chronic_renal_insufficiency          |
| 199 | endovascular                         |                                      |
| 200 | thromboembolic                       |                                      |
| 201 | heart_attack                         | heart_attack                         |
| 202 | mitral_regurgitation                 |                                      |
| 203 | htn                                  | htn                                  |
| 204 | diastolic_hypertension               | diastolic_hypertension               |
| 205 | infection                            | infection                            |
| 206 | cardiovascular_diseases              | cardiovascular_diseases              |
| 207 | aneurysm                             | aneurysm                             |
| 208 | cerebral_ischemia                    | cerebral_ischemia                    |
| 209 | coronary_artery_stenosis             | coronary_artery_stenosis             |
| 210 | liver_disease                        | liver_disease                        |
| 211 | coronary_disease                     |                                      |
| 212 | cerebral_vascular_accident           |                                      |
| 213 | obesity                              | obesity                              |
| 214 | renal_impairment                     | renal_impairment                     |
| 215 | coronary_stenosis                    | coronary_stenosis                    |
| 216 | ich                                  |                                      |
| 217 | chronic_ischemic_heart_disease       | chronic_ischemic_heart_disease       |
| 218 | recruitment                          | recruitment                          |

|     |                                             |                                             |
|-----|---------------------------------------------|---------------------------------------------|
| 219 | peripheral_vascular_disease                 | peripheral_vascular_disease                 |
| 220 | atherosclerosis                             | atherosclerosis                             |
| 221 | acute_stroke                                | acute_stroke                                |
| 222 | brain_aneurysm                              | brain_aneurysm                              |
| 223 | cardiac_arrest_and_ventricular_fibrillation | cardiac_arrest_and_ventricular_fibrillation |
| 224 | acute_coronary_syndromes                    | acute_coronary_syndromes                    |
| 225 | idiopathic_dilated_cardiomyopathy           | idiopathic_dilated_cardiomyopathy           |
| 226 | comatose                                    | comatose                                    |
| 227 | old_myocardial_infarction                   | old_myocardial_infarction                   |
| 228 | syndrome                                    | syndrome                                    |
| 229 | type_ii_diabetes_mellitus                   | type_ii_diabetes_mellitus                   |
| 230 | anterior_myocardial_infarction              | anterior_myocardial_infarction              |
| 231 | mdrd                                        |                                             |
| 232 | cardiovascular_disorders                    | cardiovascular_disorders                    |
| 233 | cerebrovascular_accident                    | cerebrovascular_accident                    |
| 234 | death                                       | death                                       |
| 235 | sah                                         |                                             |
| 236 | hypercholesteremia                          |                                             |
| 237 | enzyme                                      | enzyme                                      |
| 238 | reductase                                   | reductase                                   |
| 239 | transaminase                                |                                             |
| 240 | african_american                            | african_american                            |
| 241 | caucasian                                   | caucasian                                   |
| 242 | parent                                      | parent                                      |
| 243 | family                                      | family                                      |
| 244 | family_member                               | family_member                               |
| 245 | relative                                    |                                             |
| 246 | first_degree_relative                       | first_degree_relative                       |
| 247 | mi                                          | mi                                          |
| 248 | sitting_diastolic_blood_pressure            | sitting_diastolic_blood_pressure            |
| 249 | untreated                                   |                                             |
| 250 | ejection_fraction                           | ejection_fraction                           |
| 251 | st_elevation                                | st_elevation                                |
| 252 | sitting_systolic_blood_pressure             | sitting_systolic_blood_pressure             |
| 253 | st_segment_elevation                        | st_segment_elevation                        |
| 254 | nyha_class_ii                               | nyha_class_ii                               |
| 255 | neurological_deficit                        | neurological_deficit                        |
| 256 | st_depression                               | st_depression                               |
| 257 | asymptomatic                                | asymptomatic                                |
| 258 | haemorrhage                                 | haemorrhage                                 |
| 259 | problem                                     | problem                                     |
| 260 | good_health                                 | good_health                                 |
| 261 | gait                                        | gait                                        |
| 262 | sexually_active                             | sexually_active                             |



|     |                         |                         |
|-----|-------------------------|-------------------------|
| 263 | impair                  | impair                  |
| 264 | sitting_position        |                         |
| 265 | contraindicate          | contraindicate          |
| 266 | life                    | life                    |
| 267 | general_health          | general_health          |
| 268 | awake                   | awake                   |
| 269 | stress                  |                         |
| 270 | neglect                 | neglect                 |
| 271 | mental_state            | mental_state            |
| 272 | resuscitate             | resuscitate             |
| 273 | normal_blood_pressure   | normal_blood_pressure   |
| 274 | nyha_class_i            | nyha_class_i            |
| 275 | cardiovascular_event    |                         |
| 276 | pain_onset              |                         |
| 277 | vital_sign              |                         |
| 278 | ability_to_communicate  | ability_to_communicate  |
| 279 | elevated_blood_pressure | elevated_blood_pressure |
| 280 | unresponsiveness        |                         |
| 281 | time_of_symptom_onset   |                         |
| 282 | mental_status           | mental_status           |
| 283 | physical_findings       |                         |
| 284 | unconsciousness         |                         |
| 285 | adverse_events          | adverse_events          |
| 286 | fractional_shortening   |                         |
| 287 | canadian                | canadian                |
| 288 | taiwan                  | taiwan                  |
| 289 | european                | european                |
| 290 | community               | community               |
| 291 | reside                  |                         |
| 292 | cigarette_smoking       | cigarette_smoking       |
| 293 | document                | document                |
| 294 | diagnosis               | diagnosis               |
| 295 | enrollment              | enrollment              |
| 296 | meet                    | meet                    |
| 297 | schedule                | schedule                |
| 298 | cardiac_catheterization | cardiac_catheterization |
| 299 | enroll                  |                         |
| 300 | evaluation              | evaluation              |
| 301 | prescription            | prescription            |
| 302 | primary_care            | primary_care            |
| 303 | prescribe               | prescribe               |
| 304 | examination             | examination             |
| 305 | visual_estimation       | visual_estimation       |
| 306 | report                  |                         |
| 307 | eligibility             | eligibility             |
| 308 | hospitalization         | hospitalization         |

|     |                                    |                                    |
|-----|------------------------------------|------------------------------------|
| 309 | admission                          | admission                          |
| 310 | discharge                          | discharge                          |
| 311 | physical                           | physical                           |
| 312 | hospital_admission                 | hospital_admission                 |
| 313 | placement                          | placement                          |
| 314 | investigation                      | investigation                      |
| 315 | discontinuation                    | discontinuation                    |
| 316 | physical_examination               | physical_examination               |
| 317 | assist                             | assist                             |
| 318 | acute_care                         | acute_care                         |
| 319 | clinic_visits                      | clinic_visits                      |
| 320 | position                           |                                    |
| 321 | application                        | application                        |
| 322 | patient_informed                   | patient_informed                   |
| 323 | follow_up                          |                                    |
| 324 | on_admission                       | on_admission                       |
| 325 | intrauterine_device                | intrauterine_device                |
| 326 | patient_care                       |                                    |
| 327 | apply                              | apply                              |
| 328 | health_care                        |                                    |
| 329 | service                            |                                    |
| 330 | damage                             | damage                             |
| 331 | emergency                          | emergency                          |
| 332 | rupture                            |                                    |
| 333 | trauma                             | trauma                             |
| 334 | nitrate                            | nitrate                            |
| 335 | therapeutic_goal                   | therapeutic_goal                   |
| 336 | radionuclide_imaging               | radionuclide_imaging               |
| 337 | stroke_risk                        |                                    |
| 338 | mental_test_score                  |                                    |
| 339 | lvef                               | lvef                               |
| 340 | left_ventricular_ejection_fraction | left_ventricular_ejection_fraction |
| 341 | scale                              |                                    |
| 342 | hematocrit                         |                                    |
| 343 | sitting_blood_pressure             | sitting_blood_pressure             |
| 344 | cardiac_enzymes                    | cardiac_enzymes                    |
| 345 | screen                             | screen                             |
| 346 | test                               | test                               |
| 347 | total_cholesterol                  | total_cholesterol                  |
| 348 | stemi                              |                                    |
| 349 | calculate                          | calculate                          |
| 350 | serum_creatinine                   | serum_creatinine                   |
| 351 | plasma_glucose                     | plasma_glucose                     |
| 352 | preserve                           | preserve                           |
| 353 | genotype                           | genotype                           |

|     |                               |                         |
|-----|-------------------------------|-------------------------|
| 354 | provision                     |                         |
| 355 | creatinine_clearance          | creatinine_clearance    |
| 356 | determination                 | determination           |
| 357 | analysis                      |                         |
| 358 | tlc                           | tlc                     |
| 359 | serum_triglycerides           | serum_triglycerides     |
| 360 | fasting_blood_glucose         | fasting_blood_glucose   |
| 361 | urinalysis                    |                         |
| 362 | serum_ldl                     | serum_ldl               |
| 363 | device                        | device                  |
| 364 | stent                         | stent                   |
| 365 | system                        | system                  |
| 366 | valve                         |                         |
| 367 | cuff                          | cuff                    |
| 368 | pacemaker                     | pacemaker               |
| 369 | defibrillator                 | defibrillator           |
| 370 | pump                          |                         |
| 371 | metre                         | metre                   |
| 372 | telephone                     | telephone               |
| 373 | barrier                       | barrier                 |
| 374 | sphygmomanometer              | sphygmomanometer        |
| 375 | implantable                   |                         |
| 376 | aortic_balloon_pump           | aortic_balloon_pump     |
| 377 | blood_pressure_monitor        | blood_pressure_monitor  |
| 378 | coil                          | coil                    |
| 379 | cardioverter                  |                         |
| 380 | assistive_device              |                         |
| 381 | catheter                      | catheter                |
| 382 | biventricular_pacemaker       | biventricular_pacemaker |
| 383 | balloon                       | balloon                 |
| 384 | arterial_line                 | arterial_line           |
| 385 | stand                         |                         |
| 386 | limb_lead                     |                         |
| 387 | cane                          |                         |
| 388 | suffer                        |                         |
| 389 | depression                    | depression              |
| 390 | aphasia                       | aphasia                 |
| 391 | language_impairment           | language_impairment     |
| 392 | practice                      | practice                |
| 393 | understand                    |                         |
| 394 | experience                    | experience              |
| 395 | judgement                     | judgement               |
| 396 | satisfy                       |                         |
| 397 | cognitive_function            |                         |
| 398 | perception                    | perception              |
| 399 | angiotensin_converting_enzyme |                         |

|     |                                  |                                  |
|-----|----------------------------------|----------------------------------|
| 400 | heart_beat                       | heart_beat                       |
| 401 | movement                         | movement                         |
| 402 | hemodynamic                      | hemodynamic                      |
| 403 | vision                           |                                  |
| 404 | sinus_rhythm                     | sinus_rhythm                     |
| 405 | renal_function                   | renal_function                   |
| 406 | hemodynamically                  |                                  |
| 407 | kidney_function                  | kidney_function                  |
| 408 | congo_red_stain                  | congo_red_stain                  |
| 409 | female                           |                                  |
| 410 | male                             | male                             |
| 411 | gender                           | gender                           |
| 412 | qrs_duration                     | qrs_duration                     |
| 413 | sex                              | sex                              |
| 414 | patient_is_male                  | patient_is_male                  |
| 415 | bearing child                    | bearing child                    |
| 416 | menopausal                       | menopausal                       |
| 417 | pregnant                         | pregnant                         |
| 418 | postmenopausal                   | postmenopausal                   |
| 419 | pregnancy_test                   | pregnancy_test                   |
| 420 | lactate                          | lactate                          |
| 421 | pregnancy                        | pregnancy                        |
| 422 | urine_pregnancy_test             | urine_pregnancy_test             |
| 423 | negative_pregnancy_test          | negative_pregnancy_test          |
| 424 | bear                             | bear                             |
| 425 | verbal                           |                                  |
| 426 | not_pregnant                     | not_pregnant                     |
| 427 | child_bearing                    | child_bearing                    |
| 428 | balance                          | balance                          |
| 429 | pulse_pressure                   | pulse_pressure                   |
| 430 | average_diastolic_blood_pressure | average_diastolic_blood_pressure |
| 431 | birthday                         | birthday                         |
| 432 | speech                           |                                  |
| 433 | stenosis                         | stenosis                         |
| 434 | cardiac_arrest                   | cardiac_arrest                   |
| 435 | occlusion                        | occlusion                        |
| 436 | infarct                          | infarct                          |
| 437 | sterile                          | sterile                          |
| 438 | ventricular_tachycardia          | ventricular_tachycardia          |
| 439 | amyloid                          | amyloid                          |
| 440 | dysfunction                      | dysfunction                      |
| 441 | infarction                       | infarction                       |
| 442 | complication                     | complication                     |
| 443 | arrythmia                        | arrythmia                        |
| 444 | atrial_fibrillation              | atrial_fibrillation              |

|     |                                         |                                       |
|-----|-----------------------------------------|---------------------------------------|
| 445 | hemorrhagic_stroke                      | hemorrhagic_stroke                    |
| 446 | left_ventricular_dysfunction            | left_ventricular_dysfunction          |
| 447 | systolic_dysfunction                    | systolic_dysfunction                  |
| 448 | diastolic_dysfunction                   | diastolic_dysfunction                 |
| 449 | left_ventricular_systolic_dysfunction   | left_ventricular_systolic_dysfunction |
| 450 | shock                                   |                                       |
| 451 | tachyarrhythmia                         | tachyarrhythmia                       |
| 452 | ventricular_arrhythmia                  |                                       |
| 453 | haemorrhagic_stroke                     | haemorrhagic_stroke                   |
| 454 | insulin_resistance                      | insulin_resistance                    |
| 455 | fluid_retention                         | fluid_retention                       |
| 456 | stenose                                 |                                       |
| 457 | apnea                                   | apnea                                 |
| 458 | hypertrophy                             | hypertrophy                           |
| 459 | medication                              | medication                            |
| 460 | dbp                                     | dbp                                   |
| 461 | antihypertensive                        | antihypertensive                      |
| 462 | drug                                    | drug                                  |
| 463 | diuretic                                | diuretic                              |
| 464 | blocker                                 |                                       |
| 465 | statin                                  | statin                                |
| 466 | ace_inhibitor                           | ace_inhibitor                         |
| 467 | beta_blocker                            | beta_blocker                          |
| 468 | agent                                   | agent                                 |
| 469 | inhibitor                               |                                       |
| 470 | acei                                    |                                       |
| 471 | angiotensin                             |                                       |
| 472 | antihypertensive_agents                 | antihypertensive_agents               |
| 473 | oral_hypoglycemic                       |                                       |
| 474 | insulin                                 | insulin                               |
| 475 | antihypertensive_drugs                  | antihypertensive_drugs                |
| 476 | aspirin                                 | aspirin                               |
| 477 | angiotensin_ii_receptor_blocker         | angiotensin_ii_receptor_blocker       |
| 478 | hydralazine                             | hydralazine                           |
| 479 | antiarrhythmic_drug                     | antiarrhythmic_drug                   |
| 480 | angiotensin_converting_enzyme_inhibitor |                                       |
| 481 | antiarrhythmic                          | antiarrhythmic                        |
| 482 | enzyme_inhibitor                        | enzyme_inhibitor                      |
| 483 | simvastatin                             | simvastatin                           |
| 484 | amlodipine                              | amlodipine                            |
| 485 | hydrochlorothiazide                     | hydrochlorothiazide                   |
| 486 | hypertensive_medication                 | hypertensive_medication               |
| 487 | nonischemic                             | nonischemic                           |
| 488 | diuretics                               | diuretics                             |
| 489 | aldosterone_antagonist                  | aldosterone_antagonist                |

|     |                            |                         |
|-----|----------------------------|-------------------------|
| 490 | calcium_channel_blocker    | calcium_channel_blocker |
| 491 | antihypertensive_drug      | antihypertensive_drug   |
| 492 | atp                        | atp                     |
| 493 | spermicide                 | spermicide              |
| 494 | ezetimibe                  | ezetimibe               |
| 495 | aldosterone_inhibitor      | aldosterone_inhibitor   |
| 496 | hctz                       | hctz                    |
| 497 | clopidogrel                | clopidogrel             |
| 498 | thiazide_diuretic          |                         |
| 499 | steroid                    | steroid                 |
| 500 | survive                    | survive                 |
| 501 | loop_diuretic              |                         |
| 502 | furosemide                 | furosemide              |
| 503 | aldosterone                | aldosterone             |
| 504 | digoxin                    |                         |
| 505 | oral_contraceptives        | oral_contraceptives     |
| 506 | telmisartan                |                         |
| 507 | atorvastatin               | atorvastatin            |
| 508 | vasodilator                |                         |
| 509 | antiarrhythmic_drugs       | antiarrhythmic_drugs    |
| 510 | irbesartan                 | irbesartan              |
| 511 | antihypertensive_agent     |                         |
| 512 | valsartan                  |                         |
| 513 | agonist                    |                         |
| 514 | medicine                   | medicine                |
| 515 | adenosine                  | adenosine               |
| 516 | estrogen_antagonist        |                         |
| 517 | hyzaar                     |                         |
| 518 | potassium_sparing_diuretic |                         |
| 519 | hypotensive                | hypotensive             |
| 520 | alcohol                    |                         |
| 521 | hypoglycemic_agents        | hypoglycemic_agents     |
| 522 | calcium                    |                         |
| 523 | depend                     |                         |
| 524 | hcg                        |                         |
| 525 | candesartan                |                         |
| 526 | losartan_potassium         |                         |
| 527 | woman                      | woman                   |
| 528 | man                        | man                     |
| 529 | single                     | single                  |
| 530 | native                     | native                  |
| 531 | participant                | participant             |
| 532 | candidate                  |                         |
| 533 | group                      | group                   |
| 534 | individual                 | individual              |
| 535 | guardian                   | guardian                |

|     |                           |                           |
|-----|---------------------------|---------------------------|
| 536 | american                  | american                  |
| 537 | witness                   | witness                   |
| 538 | person                    | person                    |
| 539 | indicative                |                           |
| 540 | legal_guardian            | legal_guardian            |
| 541 | race                      | race                      |
| 542 | african                   |                           |
| 543 | cohort                    | cohort                    |
| 544 | volunteer                 | volunteer                 |
| 545 | hispanic                  | hispanic                  |
| 546 | team                      |                           |
| 547 | men                       |                           |
| 548 | chinese                   |                           |
| 549 | black                     |                           |
| 550 | member_of                 |                           |
| 551 | angiotensin_receptor      | angiotensin_receptor      |
| 552 | receptor                  | receptor                  |
| 553 | aldosterone_receptor      | aldosterone_receptor      |
| 554 | informed_consent          | informed_consent          |
| 555 | consent                   |                           |
| 556 | informed_consent_form     | informed_consent_form     |
| 557 | legislation               |                           |
| 558 | informed_consent_obtained | informed_consent_obtained |
| 559 | study_protocol            |                           |
| 560 | questionnaire             | questionnaire             |
| 561 | consent_form              | consent_form              |
| 562 | symptom                   | symptom                   |
| 563 | sign                      | sign                      |
| 564 | chest_pain                | chest_pain                |
| 565 | condition                 | condition                 |
| 566 | occur                     |                           |
| 567 | syncope                   | syncope                   |
| 568 | signs_and_symptoms        | signs_and_symptoms        |
| 569 | hemiplegia                | hemiplegia                |
| 570 | paresis                   | paresis                   |
| 571 | finding                   |                           |
| 572 | chest_discomfort          | chest_discomfort          |
| 573 | atypical_chest_pain       | atypical_chest_pain       |
| 574 | framingham                |                           |
| 575 | pain                      | pain                      |
| 576 | shortness_of_breath       |                           |
| 577 | feature                   |                           |
| 578 | dyspnea                   |                           |
| 579 | discomfort                | discomfort                |
| 580 | pacemaker_rhythm          |                           |
| 581 | hypokinesia               | hypokinesia               |

|     |                                                      |                                                      |
|-----|------------------------------------------------------|------------------------------------------------------|
| 582 | thrombotic                                           |                                                      |
| 583 | treatment                                            | treatment                                            |
| 584 | therapy                                              | therapy                                              |
| 585 | implant                                              | implant                                              |
| 586 | procedure                                            | procedure                                            |
| 587 | cabg                                                 | cabg                                                 |
| 588 | treat                                                | treat                                                |
| 589 | surgery                                              | surgery                                              |
| 590 | implantation                                         | implantation                                         |
| 591 | treated_with                                         | treated_with                                         |
| 592 | ace                                                  | ace                                                  |
| 593 | placebo                                              | placebo                                              |
| 594 | replacement                                          | replacement                                          |
| 595 | presence_of                                          |                                                      |
| 596 | monotherapy                                          |                                                      |
| 597 | intervention                                         | intervention                                         |
| 598 | medical_therapy                                      | medical_therapy                                      |
| 599 | regimen                                              | regimen                                              |
| 600 | treated_for                                          | treated_for                                          |
| 601 | revascularization                                    | revascularization                                    |
| 602 | coronary_artery_bypass_graftin<br>g                  | coronary_artery_bypass_graftin<br>g                  |
| 603 | antihypertensive_therapy                             | antihypertensive_therapy                             |
| 604 | surgically                                           | surgically                                           |
| 605 | administration                                       | administration                                       |
| 606 | ptca                                                 | ptca                                                 |
| 607 | percutaneous_coronary_interven<br>tion               | percutaneous_coronary_interven<br>tion               |
| 608 | coronary_artery_bypass_surger<br>y                   | coronary_artery_bypass_surger<br>y                   |
| 609 | off_pump_coronary_artery_byp<br>ass                  | off_pump_coronary_artery_byp<br>ass                  |
| 610 | minimally_invasive_direct_coro<br>nary_artery_bypass | minimally_invasive_direct_coro<br>nary_artery_bypass |
| 611 | coronary_artery_bypass_graft                         | coronary_artery_bypass_graft                         |
| 612 | stenting                                             | stenting                                             |
| 613 | implante                                             |                                                      |
| 614 | therapeutic                                          | therapeutic                                          |
| 615 | angioplasty                                          | angioplasty                                          |
| 616 | rescue                                               |                                                      |
| 617 | catheterization                                      | catheterization                                      |
| 618 | cardiac_surgery                                      |                                                      |
| 619 | drug_therapy                                         | drug_therapy                                         |
| 620 | defibrillation                                       | defibrillation                                       |
| 621 | prevention                                           |                                                      |
| 622 | infusion                                             |                                                      |
| 623 | rehabilitation                                       | rehabilitation                                       |



|     |                                                    |                                                    |
|-----|----------------------------------------------------|----------------------------------------------------|
| 624 | hysterectomy                                       |                                                    |
| 625 | detection                                          |                                                    |
| 626 | surgical                                           |                                                    |
| 627 | tubal_ligation                                     | tubal_ligation                                     |
| 628 | bypass                                             | bypass                                             |
| 629 | percutaneous_transluminal_cor<br>onary_angioplasty | percutaneous_transluminal_cor<br>onary_angioplasty |
| 630 | procedural                                         |                                                    |
| 631 | thrombolytic_therapy                               | thrombolytic_therapy                               |
| 632 | release                                            |                                                    |
| 633 | coronary_artery_bypass                             | coronary_artery_bypass                             |
| 634 | elute                                              |                                                    |
| 635 | vad                                                |                                                    |
| 636 | dialysis                                           | dialysis                                           |
| 637 | perfusion                                          | perfusion                                          |
| 638 | acute_treatment                                    | acute_treatment                                    |
| 639 | coronary_angioplasty                               | coronary_angioplasty                               |
| 640 | cardioversion                                      | cardioversion                                      |
| 641 | treated_by                                         |                                                    |
| 642 | radiologically                                     |                                                    |
| 643 | prior_treatment                                    |                                                    |
| 644 | combination_therapy                                | combination_therapy                                |
| 645 | heart_transplant                                   |                                                    |
| 646 | ablation                                           |                                                    |
| 647 | contraceptive_methods                              | contraceptive_methods                              |
| 648 | abdominal_aortic_aneurysm_re<br>pair               | abdominal_aortic_aneurysm_re<br>pair               |
| 649 | injection                                          |                                                    |
| 650 | reperfusion                                        | reperfusion                                        |
| 651 | hormone_therapy                                    | hormone_therapy                                    |
| 652 | hormone_replacement_therapy                        | hormone_replacement_therapy                        |
| 653 | primary_prevention                                 | primary_prevention                                 |
| 654 | secondary_prevention                               | secondary_prevention                               |
| 655 | resuscitation                                      | resuscitation                                      |
| 656 | dissection                                         | dissection                                         |
| 657 | implant_procedure                                  | implant_procedure                                  |
| 658 | atherectomy                                        | atherectomy                                        |
| 659 | treatment_regimen                                  | treatment_regimen                                  |
| 660 | operation                                          | operation                                          |
| 661 | aneurysm_repair                                    | aneurysm_repair                                    |
| 662 | revision                                           | revision                                           |
| 663 | vascular_surgery                                   | vascular_surgery                                   |
| 664 | cardiac_surgical_procedure                         | cardiac_surgical_procedure                         |
| 665 | stent_placement                                    | stent_placement                                    |
| 666 | bilateral_oophorectomy                             | bilateral_oophorectomy                             |
| 667 | ct_protocol                                        | ct_protocol                                        |

|     |                  |                      |
|-----|------------------|----------------------|
| 668 | physical_therapy | physical_therapy     |
| 669 |                  | a1                   |
| 670 |                  | absence_of           |
| 671 |                  | acc                  |
| 672 |                  | acquisition          |
| 673 |                  | activation           |
| 674 |                  | af                   |
| 675 |                  | alone                |
| 676 |                  | association          |
| 677 |                  | arrival              |
| 678 |                  | arrive               |
| 679 |                  | assess               |
| 680 |                  | attention            |
| 681 |                  | b                    |
| 682 |                  | calculation          |
| 683 |                  | laboratory           |
| 684 |                  | care                 |
| 685 |                  | carry                |
| 686 |                  | characterise         |
| 687 |                  | classify             |
| 688 |                  | clinic               |
| 689 |                  | co operate           |
| 690 |                  | comparison           |
| 691 |                  | conduct              |
| 692 |                  | conduction           |
| 693 |                  | conscious            |
| 694 |                  | consumption          |
| 695 |                  | core                 |
| 696 |                  | count                |
| 697 |                  | counts               |
| 698 |                  | counts               |
| 699 |                  | decision             |
| 700 |                  | deliver              |
| 701 |                  | delivery             |
| 702 |                  | disorder             |
| 703 |                  | dispense             |
| 704 |                  | dm                   |
| 705 |                  | double               |
| 706 |                  | dwi                  |
| 707 |                  | emergency_department |
| 708 |                  | enable               |
| 709 |                  | esc                  |
| 710 |                  | fda                  |
| 711 |                  | fill                 |
| 712 |                  | find                 |
| 713 |                  | finish               |
| 714 |                  | hi                   |
| 715 |                  | hospital             |
| 716 |                  | hospitalize          |
| 717 |                  | i                    |
| 718 |                  | i.                   |

|     |                    |
|-----|--------------------|
| 719 | ii                 |
| 720 | iib                |
| 721 | iii                |
| 722 | iiib               |
| 723 | iiic               |
| 724 | indicate           |
| 725 | institution        |
| 726 | intention          |
| 727 | interview          |
| 728 | iv                 |
| 729 | lead               |
| 730 | life               |
| 731 | load               |
| 732 | lv                 |
| 733 | maintain           |
| 734 | maintenance        |
| 735 | maintenance        |
| 736 | mass               |
| 737 | mb                 |
| 738 | mca                |
| 739 | medical_center     |
| 740 | mini               |
| 741 | mv                 |
| 742 | institutes         |
| 743 | nih                |
| 744 | none               |
| 745 | normal             |
| 746 | obtain             |
| 747 | order              |
| 748 | outpatient_clinic  |
| 749 | outpatient_clinics |
| 750 | pace               |
| 751 | participation      |
| 752 | pharmacy           |
| 753 | pi                 |
| 754 | purchase           |
| 755 | q                  |
| 756 | receipt            |
| 757 | recovery           |
| 758 | recruit            |
| 759 | repair             |
| 760 | represent          |
| 761 | representative     |
| 762 | response           |
| 763 | resynchronization  |
| 764 | run                |
| 765 | seat               |
| 766 | secondary          |
| 767 | secondary_to       |
| 768 | select             |
| 769 | separate           |

|     |                      |
|-----|----------------------|
| 770 | sjm                  |
| 771 | stop                 |
| 772 | supply               |
| 773 | support              |
| 774 | take                 |
| 775 | tg                   |
| 776 | think                |
| 777 | tia                  |
| 778 | titrate              |
| 779 | titrate              |
| 780 | tpa                  |
| 781 | type                 |
| 782 | university_hospital  |
| 783 | v4                   |
| 784 | visit                |
| 785 | vt                   |
| 786 | wash                 |
| 787 | wear                 |
| 788 | with_type            |
| 789 | withdraw             |
| 790 | withdrawn            |
| 791 | within_normal_limits |
| 792 | write                |

Appendix 3

**Manual Evaluation of the Machine-powered CDEs  
for the Breast Cancer Trials**

| <b>CDE ID</b> | <b>Human-based CDEs</b> | <b>Machine-powered CDEs</b> |
|---------------|-------------------------|-----------------------------|
| 1             | age                     | age                         |
| 2             | child                   | child                       |
| 3             | adult                   | adult                       |
| 4             | protein                 | protein                     |
| 5             | serum_albumin           | serum_albumin               |
| 6             | lh rh                   |                             |
| 7             | her2neu                 |                             |
| 8             | doxorubicin             | doxorubicin                 |
| 9             | mitomycin               | mitomycin                   |
| 10            | abstinence              |                             |
| 11            | smoker                  | smoker                      |
| 12            | hemoglobin              | hemoglobin                  |
| 13            | bilirubin               | bilirubin                   |
| 14            | creatinine              | creatinine                  |
| 15            | total_bilirubin         | total_bilirubin             |
| 16            | cish                    | cish                        |
| 17            | hb                      | hb                          |
| 18            | urine_protein           | urine_protein               |
| 19            | albumin                 | albumin                     |
| 20            | na                      | na                          |
| 21            | triglyceride            | triglyceride                |
| 22            | component               | component                   |
| 23            | sodium                  | sodium                      |
| 24            | creatine                | creatine                    |
| 25            | bun                     |                             |
| 26            | aspartate               |                             |
| 27            | hepatic                 | hepatic                     |
| 28            | axillary                | axillary                    |
| 29            | chest                   | chest                       |
| 30            | nodal                   | nodal                       |
| 31            | abdominal               | abdominal                   |
| 32            | axilla                  | axilla                      |
| 33            | abdomen                 | abdomen                     |
| 34            | location                | location                    |
| 35            | sole                    | sole                        |
| 36            | pelvic                  |                             |
| 37            | pelvis                  |                             |
| 38            | face                    | face                        |
| 39            | portal                  | portal                      |

|    |                      |                      |
|----|----------------------|----------------------|
| 40 | thorax               |                      |
| 41 | breast               | breast               |
| 42 | margin               | margin               |
| 43 | node                 | node                 |
| 44 | organ                |                      |
| 45 | bone                 | bone                 |
| 46 | liver                | liver                |
| 47 | renal                | renal                |
| 48 | brain                | brain                |
| 49 | marrow               | marrow               |
| 50 | lymph_node           | lymph_node           |
| 51 | sentinel_node        | sentinel_node        |
| 52 | lymph_nodes          | lymph_nodes          |
| 53 | axillary_lymph_nodes | axillary_lymph_nodes |
| 54 | cardiac              | cardiac              |
| 55 | ipsilateral          | ipsilateral          |
| 56 | axillary_lymph_node  | axillary_lymph_node  |
| 57 | ovary                | ovary                |
| 58 | kidney               | kidney               |
| 59 | chest_wall           | chest_wall           |
| 60 | uterus               | uterus               |
| 61 | sentinel_lymph_node  | sentinel_lymph_node  |
| 62 | diaphragm            | diaphragm            |
| 63 | surgical_margins     | surgical_margins     |
| 64 | follicle             | follicle             |
| 65 | axillary_node        | axillary_node        |
| 66 | arm                  | arm                  |
| 67 | medullary            | medullary            |
| 68 | breast_tissue        | breast_tissue        |
| 69 | lung                 | lung                 |
| 70 | oviductal            |                      |
| 71 | ovarian              | ovarian              |
| 72 | heart                |                      |
| 73 | hand                 | hand                 |
| 74 | curatively           |                      |
| 75 | surgical_specimen    | surgical_specimen    |
| 76 | parenchymal          |                      |
| 77 | nipple               |                      |
| 78 | abdomen_and_pelvis   |                      |
| 79 | oral                 |                      |
| 80 | urine                | urine                |
| 81 | blood                | blood                |
| 82 | plasma               | plasma               |
| 83 | lymph                | lymph                |
| 84 | blood_sample         | blood_sample         |
| 85 | skin                 | skin                 |

|     |                           |                           |
|-----|---------------------------|---------------------------|
| 86  | endocrine                 | endocrine                 |
| 87  | whole_breast              | whole_breast              |
| 88  | central_nervous_system    | central_nervous_system    |
| 89  | platelet                  | platelet                  |
| 90  | cell                      | cell                      |
| 91  | neutrophil                | neutrophil                |
| 92  | wbc                       | wbc                       |
| 93  | leucocyte                 | leucocyte                 |
| 94  | basal_cell                | basal_cell                |
| 95  | white_blood_cell          | white_blood_cell          |
| 96  | stem_cell                 | stem_cell                 |
| 97  | granulocyte               | granulocyte               |
| 98  | tumor_cells               | tumor_cells               |
| 99  | grade                     |                           |
| 100 | stage_i                   | stage_i                   |
| 101 | stage_iv                  | stage_iv                  |
| 102 | stage_ii                  | stage_ii                  |
| 103 | stage_iiib                | stage_iiib                |
| 104 | type                      |                           |
| 105 | classify                  | classify                  |
| 106 | categorize                | categorize                |
| 107 | class_i                   | class_i                   |
| 108 | classification            | classification            |
| 109 | stage_ia                  | stage_ia                  |
| 110 | stage_iii                 | stage_iii                 |
| 111 | stage_iiic                | stage_iiic                |
| 112 | stage_iiia                | stage_iiia                |
| 113 | histologic_grade          |                           |
| 114 | class                     |                           |
| 115 | subtype                   | subtype                   |
| 116 | performance_status        | performance_status        |
| 117 | ecog_performance_status   | ecog_performance_status   |
| 118 | stage                     |                           |
| 119 | response                  |                           |
| 120 | unresectable              |                           |
| 121 | zubrod                    | zubrod                    |
| 122 | bmi                       |                           |
| 123 | zubrod_performance_status | zubrod_performance_status |
| 124 | clearance                 | clearance                 |
| 125 | blood_pressure            | blood_pressure            |
| 126 | weight                    | weight                    |
| 127 | body_mass_index           | body_mass_index           |
| 128 | age_at_diagnosis          | age_at_diagnosis          |
| 129 | diastolic                 | diastolic                 |
| 130 | primary_diagnosis         | primary_diagnosis         |
| 131 | exposure_to               |                           |

|     |                                                       |                                                       |
|-----|-------------------------------------------------------|-------------------------------------------------------|
| 132 | eastern_cooperative_oncology_group_performance_status | eastern_cooperative_oncology_group_performance_status |
| 133 | prior_hormone_therapy                                 | prior_hormone_therapy                                 |
| 134 | cancer_registry                                       | cancer_registry                                       |
| 135 | medical_records                                       | medical_records                                       |
| 136 | pathologic_stage                                      | pathologic_stage                                      |
| 137 | ecog                                                  | ecog                                                  |
| 138 | diagnose                                              | diagnose                                              |
| 139 | mri                                                   | mri                                                   |
| 140 | mammogram                                             | mammogram                                             |
| 141 | scan                                                  |                                                       |
| 142 | ultrasound                                            | ultrasound                                            |
| 143 | assessment                                            |                                                       |
| 144 | echocardiogram                                        | echocardiogram                                        |
| 145 | ct                                                    |                                                       |
| 146 | mammography                                           | mammography                                           |
| 147 | bone_scan                                             | bone_scan                                             |
| 148 | muga                                                  | muga                                                  |
| 149 | ct_scan                                               | ct_scan                                               |
| 150 | muga_scan                                             | muga_scan                                             |
| 151 | karnofsky_performance_status                          | karnofsky_performance_status                          |
| 152 | core_biopsy                                           | core_biopsy                                           |
| 153 | karnofsky                                             | karnofsky                                             |
| 154 | histological_diagnosis                                | histological_diagnosis                                |
| 155 | sentinel_node_biopsy                                  | sentinel_node_biopsy                                  |
| 156 | pet_scan                                              | pet_scan                                              |
| 157 | gault                                                 |                                                       |
| 158 | echo                                                  | echo                                                  |
| 159 | exam                                                  |                                                       |
| 160 | physical_exam                                         | physical_exam                                         |
| 161 | echocardiography                                      | echocardiography                                      |
| 162 | ecg                                                   | ecg                                                   |
| 163 | spiral_ct_scan                                        | spiral_ct_scan                                        |
| 164 | computed_tomography                                   |                                                       |
| 165 | incisional_biopsy                                     | incisional_biopsy                                     |
| 166 | electrocardiogram                                     | electrocardiogram                                     |
| 167 | ekg                                                   | ekg                                                   |
| 168 | rad                                                   | rad                                                   |
| 169 | pet                                                   | pet                                                   |
| 170 | karnofsky_index                                       | karnofsky_index                                       |
| 171 | breast_biopsy                                         | breast_biopsy                                         |
| 172 | hercept                                               | hercept                                               |
| 173 | scintigraphy                                          | scintigraphy                                          |
| 174 | clinical_diagnosis                                    |                                                       |
| 175 | spiral_ct                                             | spiral_ct                                             |
| 176 | bilateral_mammography                                 |                                                       |



|     |                             |                             |
|-----|-----------------------------|-----------------------------|
| 177 | fine_needle_aspiration      | fine_needle_aspiration      |
| 178 | excisional_biopsy           | excisional_biopsy           |
| 179 | magnetic_resonance_imaging  |                             |
| 180 | birad                       | birad                       |
| 181 | liver_imaging               |                             |
| 182 | pet_scans                   | pet_scans                   |
| 183 | echography                  |                             |
| 184 | cancer_diagnosis            | cancer_diagnosis            |
| 185 | sentinel_lymph_node_biopsy  | sentinel_lymph_node_biopsy  |
| 186 | mammographic                |                             |
| 187 | modality                    | modality                    |
| 188 | surgical_biopsy             |                             |
| 189 | tomography                  |                             |
| 190 | screening_examination       |                             |
| 191 | sentinel_lymph_node_mapping | sentinel_lymph_node_mapping |
| 192 | ct_scans                    |                             |
| 193 | tumor_stage                 | tumor_stage                 |
| 194 | qtc                         | qtc                         |
| 195 | mammographically            | mammographically            |
| 196 | chest_ct                    | chest_ct                    |
| 197 | sonography                  | sonography                  |
| 198 | rheumatologic               | rheumatologic               |
| 199 | computerized_tomography     | computerized_tomography     |
| 200 | disease                     | disease                     |
| 201 | measurable_disease          | measurable_disease          |
| 202 | advanced_disease            | advanced_disease            |
| 203 | disease_progression         | disease_progression         |
| 204 | evaluable                   | evaluable                   |
| 205 | asat                        | asat                        |
| 206 | evaluable_disease           | evaluable_disease           |
| 207 | abnormality                 | abnormality                 |
| 208 | relapse                     | relapse                     |
| 209 | amenorrhea                  | amenorrhea                  |
| 210 | recurrent_disease           | recurrent_disease           |
| 211 | syndrome                    | syndrome                    |
| 212 | infection                   |                             |
| 213 | progressive_disease         | progressive_disease         |
| 214 | peripheral_neuropathy       | peripheral_neuropathy       |
| 215 | stable_disease              | stable_disease              |
| 216 | bone_disease                | bone_disease                |
| 217 | congestive_heart_failure    | congestive_heart_failure    |
| 218 | hypertension                | hypertension                |
| 219 | no_evidence_of_disease      | no_evidence_of_disease      |
| 220 | illness                     | illness                     |
| 221 | neuropathy                  | neuropathy                  |
| 222 | hot_spots                   | hot_spots                   |

|     |                            |                            |
|-----|----------------------------|----------------------------|
| 223 | angina                     |                            |
| 224 | breast_disease             | breast_disease             |
| 225 | tubular                    | tubular                    |
| 226 | primary_disease            | primary_disease            |
| 227 | lymphedema                 | lymphedema                 |
| 228 | cessation_of_menses        | cessation_of_menses        |
| 229 | pleural_effusions          | pleural_effusions          |
| 230 | impairment                 | impairment                 |
| 231 | recurrence_of_disease      | recurrence_of_disease      |
| 232 | adrenal_insufficiency      | adrenal_insufficiency      |
| 233 | angina_pectoris            | angina_pectoris            |
| 234 | incurable                  |                            |
| 235 | myocardial_infarction      |                            |
| 236 | spinal_cord_compression    | spinal_cord_compression    |
| 237 | cavity                     | cavity                     |
| 238 | disorder                   |                            |
| 239 | osteoporosis               | osteoporosis               |
| 240 | obese                      | obese                      |
| 241 | pleural_effusion           | pleural_effusion           |
| 242 | hypercalcemia              |                            |
| 243 | heart_disease              |                            |
| 244 | chest_wall_disease         | chest_wall_disease         |
| 245 | dementia                   | dementia                   |
| 246 | cardiovascular_disease     |                            |
| 247 | cardiac_disease            |                            |
| 248 | sgot                       | sgot                       |
| 249 | sgpt                       | sgpt                       |
| 250 | transaminase               | transaminase               |
| 251 | alat                       |                            |
| 252 | alanine_aminotransferase   | alanine_aminotransferase   |
| 253 | aspartate_aminotransferase | aspartate_aminotransferase |
| 254 | aspartate_transaminase     | aspartate_transaminase     |
| 255 | alanine_transaminase       | alanine_transaminase       |
| 256 | enzyme                     | enzyme                     |
| 257 | ethnicity                  | ethnicity                  |
| 258 | asian                      | asian                      |
| 259 | african_american           | african_american           |
| 260 | relative                   | relative                   |
| 261 | partner                    | partner                    |
| 262 | mother                     | mother                     |
| 263 | sister                     | sister                     |
| 264 | family                     | family                     |
| 265 | first_degree_relative      | first_degree_relative      |
| 266 | familial                   | familial                   |
| 267 | spouse                     | spouse                     |
| 268 | parent                     | parent                     |

|     |                                 |                                 |
|-----|---------------------------------|---------------------------------|
| 269 | family_history                  | family_history                  |
| 270 | indicate                        | indicate                        |
| 271 | absence_of                      | absence_of                      |
| 272 | alone                           | alone                           |
| 273 | mass                            | mass                            |
| 274 | unknown                         | unknown                         |
| 275 | good_health                     | good_health                     |
| 276 | ascites                         | ascites                         |
| 277 | untreated                       |                                 |
| 278 | asymptomatic                    | asymptomatic                    |
| 279 | micrometastasis                 | micrometastasis                 |
| 280 | contraindicate                  | contraindicate                  |
| 281 | bleed                           | bleed                           |
| 282 | alopecia                        | alopecia                        |
| 283 | examine                         | examine                         |
| 284 | able_to_comply_with_treatment   | able_to_comply_with_treatment   |
| 285 | ejection_fraction               | ejection_fraction               |
| 286 | source                          | source                          |
| 287 | invasion                        | invasion                        |
| 288 | problem                         |                                 |
| 289 | breast_mass                     | breast_mass                     |
| 290 | axillary_lymph_node_involvement | axillary_lymph_node_involvement |
| 291 | medical_care                    | medical_care                    |
| 292 | positive_lymph_node             | positive_lymph_node             |
| 293 | quality_of_life                 | quality_of_life                 |
| 294 | musculoskeletal_pain            | musculoskeletal_pain            |
| 295 | extremely_dense                 | extremely_dense                 |
| 296 | ability_to_swallow              | ability_to_swallow              |
| 297 | heterogeneously_dense           |                                 |
| 298 | curative_treatment              | curative_treatment              |
| 299 | normal_renal_function           | normal_renal_function           |
| 300 | shortening_fraction             | shortening_fraction             |
| 301 | positive_axillary_lymph_nodes   | positive_axillary_lymph_nodes   |
| 302 | normal_ecg                      | normal_ecg                      |
| 303 | normal_laboratory               | normal_laboratory               |
| 304 | frail                           | frail                           |
| 305 | lymph_node_involvement          | lymph_node_involvement          |
| 306 | inconclusive                    | inconclusive                    |
| 307 | a_mass                          | a_mass                          |
| 308 | separate                        | separate                        |
| 309 | able_to_speak                   |                                 |
| 310 | independent                     | independent                     |
| 311 | in_remission                    | in_remission                    |
| 312 | sexually_active                 | sexually_active                 |
| 313 | atypia                          | atypia                          |

|     |                      |                      |
|-----|----------------------|----------------------|
| 314 | adhere               | adhere               |
| 315 | adverse_events       | adverse_events       |
| 316 | michigan             | michigan             |
| 317 | reside               |                      |
| 318 | united_states        |                      |
| 319 | life_expectancy      | life_expectancy      |
| 320 | sentinel             | sentinel             |
| 321 | diagnosis            |                      |
| 322 | document             | document             |
| 323 | enrollment           |                      |
| 324 | meet                 | meet                 |
| 325 | registration         | registration         |
| 326 | evaluation           |                      |
| 327 | schedule             | schedule             |
| 328 | eligibility          | eligibility          |
| 329 | enroll               |                      |
| 330 | examination          |                      |
| 331 | physical_examination | physical_examination |
| 332 | clinical_examination | clinical_examination |
| 333 | intrauterine_device  | intrauterine_device  |
| 334 | follow_up            | follow_up            |
| 335 | discontinuation      | discontinuation      |
| 336 | report               | report               |
| 337 | register             | register             |
| 338 | screening_procedures | screening_procedures |
| 339 | physical             | physical             |
| 340 | drug_administration  | drug_administration  |
| 341 | surveillance         | surveillance         |
| 342 | prescribe            | prescribe            |
| 343 | recommendation       | recommendation       |
| 344 | placement            | placement            |
| 345 | investigation        | investigation        |
| 346 | patient_registration | patient_registration |
| 347 | after_treatment      | after_treatment      |
| 348 | hormone              | hormone              |
| 349 | thyroid_hormone      | thyroid_hormone      |
| 350 | participation        |                      |
| 351 | visit                |                      |
| 352 | performance          | performance          |
| 353 | prejudice            | prejudice            |
| 354 | voluntary            | voluntary            |
| 355 | care                 | care                 |
| 356 | disclosure           | disclosure           |
| 357 | toxicity             | toxicity             |
| 358 | neurotoxicity        | neurotoxicity        |
| 359 | lvef                 | lvef                 |

|     |                                    |                                    |
|-----|------------------------------------|------------------------------------|
| 360 | platelet_count                     | platelet_count                     |
| 361 | left_ventricular_ejection_fraction | left_ventricular_ejection_fraction |
| 362 | scale                              | scale                              |
| 363 | within_normal_limits               | within_normal_limits               |
| 364 | lci                                | lci                                |
| 365 | hgb                                | hgb                                |
| 366 | hematocrit                         | hematocrit                         |
| 367 | estrogen_receptor_positive         | estrogen_receptor_positive         |
| 368 | positive_estrogen_receptor         | positive_estrogen_receptor         |
| 369 | biopsy                             |                                    |
| 370 | ihc                                | ihc                                |
| 371 | serum_creatinine                   | serum_creatinine                   |
| 372 | test                               |                                    |
| 373 | anc                                | anc                                |
| 374 | absolute_neutrophil_count          | absolute_neutrophil_count          |
| 375 | creatinine_clearance               | creatinine_clearance               |
| 376 | histochemistry_immuno              |                                    |
| 377 | screen                             | screen                             |
| 378 | analysis                           | analysis                           |
| 379 | calculate                          | calculate                          |
| 380 | histology                          | histology                          |
| 381 | hematology                         | hematology                         |
| 382 | neutrophil_count                   | neutrophil_count                   |
| 383 | assay                              | assay                              |
| 384 | determination                      | determination                      |
| 385 | granulocyte_count                  | granulocyte_count                  |
| 386 | liver_function_tests               | liver_function_tests               |
| 387 | histochemical_immuno               |                                    |
| 388 | upc                                |                                    |
| 389 | inr                                | inr                                |
| 390 | provision                          | provision                          |
| 391 | laboratory_tests                   | laboratory_tests                   |
| 392 | cytology                           | cytology                           |
| 393 | profile                            | profile                            |
| 394 | plt                                | plt                                |
| 395 | serum_calcium                      | serum_calcium                      |
| 396 | ibc                                | ibc                                |
| 397 | cbc                                | cbc                                |
| 398 | white_blood_cell_count             | white_blood_cell_count             |
| 399 | estimated_creatinine_clearance     |                                    |
| 400 | genetic_testing                    | genetic_testing                    |
| 401 | preservation                       | preservation                       |
| 402 | serum_cholesterol                  | serum_cholesterol                  |
| 403 | serum_potassium                    | serum_potassium                    |
| 404 | international_normalized_ratio     |                                    |
| 405 | estradiol_level                    | estradiol_level                    |

|     |                                    |                                    |
|-----|------------------------------------|------------------------------------|
| 406 | serum_total_bilirubin              | serum_total_bilirubin              |
| 407 | immunocytochemistry                | immunocytochemistry                |
| 408 | leukocyte_count                    | leukocyte_count                    |
| 409 | oncotype_dx                        |                                    |
| 410 | genotype                           |                                    |
| 411 | renal_function_tests               | renal_function_tests               |
| 412 | english                            | english                            |
| 413 | able_to_read                       | able_to_read                       |
| 414 | spanish                            | spanish                            |
| 415 | french                             | french                             |
| 416 | barrier                            | barrier                            |
| 417 | core_needle_biopsy                 | core_needle_biopsy                 |
| 418 | core                               | core                               |
| 419 | carrier                            | carrier                            |
| 420 | iud                                | iud                                |
| 421 | system                             | system                             |
| 422 | device                             |                                    |
| 423 | core_needle                        | core_needle                        |
| 424 | band                               | band                               |
| 425 | table                              |                                    |
| 426 | telephone                          | telephone                          |
| 427 | indicator                          | indicator                          |
| 428 | tissue_expanders                   |                                    |
| 429 | needle                             | needle                             |
| 430 | support                            |                                    |
| 431 | psychiatric_disorders              |                                    |
| 432 | fish                               | fish                               |
| 433 | fluorescence_in_situ_hybridization | fluorescence_in_situ_hybridization |
| 434 | amplification                      | amplification                      |
| 435 | in_situ_hybridization              | in_situ_hybridization              |
| 436 | fluorescent_in_situ_hybridization  | fluorescent_in_situ_hybridization  |
| 437 | breast_cancer                      | breast_cancer                      |
| 438 | tumor                              | tumor                              |
| 439 | metastatic_disease                 | metastatic_disease                 |
| 440 | metastatic                         | metastatic                         |
| 441 | metastatic_breast_cancer           | metastatic_breast_cancer           |
| 442 | cancer                             |                                    |
| 443 | invasive_breast_cancer             | invasive_breast_cancer             |
| 444 | primary_tumor                      | primary_tumor                      |
| 445 | adenocarcinoma_of_the_breast       | adenocarcinoma_of_the_breast       |
| 446 | dci                                | dci                                |
| 447 | metastasis                         | metastasis                         |
| 448 | liver_metastases                   | liver_metastases                   |
| 449 | breast_carcinoma                   | breast_carcinoma                   |
| 450 | malignancy                         |                                    |

|     |                                     |                                     |
|-----|-------------------------------------|-------------------------------------|
| 451 | ductal_carcinoma_in_situ            | ductal_carcinoma_in_situ            |
| 452 | breast_adenocarcinoma               | breast_adenocarcinoma               |
| 453 | bone_metastases                     | bone_metastases                     |
| 454 | tumor_size                          | tumor_size                          |
| 455 | adenocarcinoma                      | adenocarcinoma                      |
| 456 | brain_metastases                    | brain_metastases                    |
| 457 | breast_tumor                        | breast_tumor                        |
| 458 | inflammatory_breast_cancer          | inflammatory_breast_cancer          |
| 459 | bone_metastasis                     | bone_metastasis                     |
| 460 | carcinoma_of_the_breast             | carcinoma_of_the_breast             |
| 461 | stage_iv_breast_cancer              | stage_iv_breast_cancer              |
| 462 | lobular_carcinoma                   | lobular_carcinoma                   |
| 463 | invasive_carcinoma_of_the_breast    | invasive_carcinoma_of_the_breast    |
| 464 | liver_metastasis                    | liver_metastasis                    |
| 465 | metastatic_tumor                    | metastatic_tumor                    |
| 466 | tumor_tissue                        | tumor_tissue                        |
| 467 | no_evidence_of_metastatic_disease   | no_evidence_of_metastatic_disease   |
| 468 | invasive_carcinoma                  | invasive_carcinoma                  |
| 469 | recurrent_breast_cancer             | recurrent_breast_cancer             |
| 470 | invasive_breast_carcinoma           | invasive_breast_carcinoma           |
| 471 | squamous_cell_carcinoma_of_the_skin | squamous_cell_carcinoma_of_the_skin |
| 472 | lobular_carcinoma_in_situ           | lobular_carcinoma_in_situ           |
| 473 | breast_cancer_diagnosis             | breast_cancer_diagnosis             |
| 474 | distant_metastasis                  | distant_metastasis                  |
| 475 | leptomeningeal                      |                                     |
| 476 | ductal_carcinoma                    |                                     |
| 477 | brca                                |                                     |
| 478 | ovarian_cancer                      | ovarian_cancer                      |
| 479 | invasive_cancer                     | invasive_cancer                     |
| 480 | unilateral_breast_cancer            | unilateral_breast_cancer            |
| 481 | melanoma_skin                       |                                     |
| 482 | residual_disease                    | residual_disease                    |
| 483 | carcinoma_in_situ_of_the_cervix     | carcinoma_in_situ_of_the_cervix     |
| 484 | metastatic_lesion                   | metastatic_lesion                   |
| 485 | carcinoma_of_the_cervix_uteri       |                                     |
| 486 | tumour_size                         | tumour_size                         |
| 487 | stage_iii_breast_cancer             | stage_iii_breast_cancer             |
| 488 | cns_metastases                      | cns_metastases                      |
| 489 | carcinoma                           | carcinoma                           |
| 490 | cancer_of_the_breast                | cancer_of_the_breast                |
| 491 | metastatic_adenocarcinoma           | metastatic_adenocarcinoma           |
| 492 | mammary_carcinoma                   | mammary_carcinoma                   |
| 493 | brain_metastasis                    | brain_metastasis                    |

|     |                               |                               |
|-----|-------------------------------|-------------------------------|
| 494 | inflammatory_breast_carcinoma | inflammatory_breast_carcinoma |
| 495 | primary_carcinoma             | primary_carcinoma             |
| 496 | residual_tumor                | residual_tumor                |
| 497 | bilateral_breast_cancer       | bilateral_breast_cancer       |
| 498 | inflammatory_carcinoma        |                               |
| 499 | tumor_progression             |                               |
| 500 | solid_tumor                   | solid_tumor                   |
| 501 | skin_cancer                   | skin_cancer                   |
| 502 | invasive_ductal_carcinoma     | invasive_ductal_carcinoma     |
| 503 | metastatic_cancer             | metastatic_cancer             |
| 504 | female_breast_cancer          | female_breast_cancer          |
| 505 | metastasize                   | metastasize                   |
| 506 | carcinoma_of_the_cervix       |                               |
| 507 | breast_tumors                 | breast_tumors                 |
| 508 | renal_function                | renal_function                |
| 509 | hepatic_function              | hepatic_function              |
| 510 | cardiac_function              | cardiac_function              |
| 511 | liver_function                | liver_function                |
| 512 | menses                        | menses                        |
| 513 | kidney_function               | kidney_function               |
| 514 | menopausal_status             | menopausal_status             |
| 515 | cardiac_ejection_fraction     | cardiac_ejection_fraction     |
| 516 | heal                          | heal                          |
| 517 | last_menstrual_period         | last_menstrual_period         |
| 518 | menstrual                     | menstrual                     |
| 519 | menstrual_cycles              | menstrual_cycles              |
| 520 | hematologic_function          | hematologic_function          |
| 521 | heart_function                | heart_function                |
| 522 | ovarian_function              | ovarian_function              |
| 523 | uterine_function              | uterine_function              |
| 524 | wound_healing                 | wound_healing                 |
| 525 | pulmonary_function            | pulmonary_function            |
| 526 | female                        | female                        |
| 527 | male                          | male                          |
| 528 | gender                        |                               |
| 529 | female_gender                 | female_gender                 |
| 530 | proband                       | proband                       |
| 531 | sex                           | sex                           |
| 532 | postmenopausal                | postmenopausal                |
| 533 | bearing_child                 |                               |
| 534 | negative_pregnancy_test       | negative_pregnancy_test       |
| 535 | menopausal                    | menopausal                    |
| 536 | pregnant                      | pregnant                      |
| 537 | pregnancy_test                | pregnancy_test                |
| 538 | pregnancy                     | pregnancy                     |
| 539 | bear                          | bear                          |



|     |                      |                      |
|-----|----------------------|----------------------|
| 540 | reproductive         | reproductive         |
| 541 | urine_pregnancy_test | urine_pregnancy_test |
| 542 | not_pregnant         | not_pregnant         |
| 543 | lactate              | lactate              |
| 544 | child_bearing        | child_bearing        |
| 545 | fertile              |                      |
| 546 | intercourse          | intercourse          |
| 547 | breastfeed           | breastfeed           |
| 548 | menstruation         | menstruation         |
| 549 | progression          | progression          |
| 550 | resistance           | resistance           |
| 551 | pathology            | pathology            |
| 552 | sterile              | sterile              |
| 553 | axillary_adenopathy  | axillary_adenopathy  |
| 554 | microcalcification   | microcalcification   |
| 555 | arrythmia            | arrythmia            |
| 556 | side_effects         | side_effects         |
| 557 | ischemic             | ischemic             |
| 558 | sterility            |                      |
| 559 | infiltrate           | infiltrate           |
| 560 | cardiac_arrhythmia   | cardiac_arrhythmia   |
| 561 | atypical_hyperplasia | atypical_hyperplasia |
| 562 | oligomenorrhea       | oligomenorrhea       |
| 563 | side_effect          | side_effect          |
| 564 | ulceration           | ulceration           |
| 565 | lytic                |                      |
| 566 | regression           | regression           |
| 567 | edema                |                      |
| 568 | trastuzumab          | trastuzumab          |
| 569 | alkaline_phosphatase | alkaline_phosphatase |
| 570 | taxane               | taxane               |
| 571 | tamoxifen            | tamoxifen            |
| 572 | anthracycline        | anthracycline        |
| 573 | medication           | medication           |
| 574 | estrogen             | estrogen             |
| 575 | herceptin            | herceptin            |
| 576 | bisphosphonate       | bisphosphonate       |
| 577 | agent                |                      |
| 578 | aromatase_inhibitor  | aromatase_inhibitor  |
| 579 | drug                 | drug                 |
| 580 | estradiol            | estradiol            |
| 581 | anastrozole          | anastrozole          |
| 582 | capecitabine         | capecitabine         |
| 583 | progesterone         | progesterone         |
| 584 | lapatinib            | lapatinib            |
| 585 | docetaxel            | docetaxel            |

|     |                                        |                                        |
|-----|----------------------------------------|----------------------------------------|
| 586 | letrozole                              | letrozole                              |
| 587 | bevacizumab                            | bevacizumab                            |
| 588 | calcium                                | calcium                                |
| 589 | paclitaxel                             | paclitaxel                             |
| 590 | dasatinib                              | dasatinib                              |
| 591 | spermicide                             | spermicide                             |
| 592 | aromatase_inhibitors                   | aromatase_inhibitors                   |
| 593 | epirubicin                             | epirubicin                             |
| 594 | oral_contraceptives                    | oral_contraceptives                    |
| 595 | steroid                                | steroid                                |
| 596 | hcg                                    | hcg                                    |
| 597 | progestagen                            | progestagen                            |
| 598 | birth_control_pills                    | birth_control_pills                    |
| 599 | cyclophosphamide                       | cyclophosphamide                       |
| 600 | fulvestrant                            | fulvestrant                            |
| 601 | adriamycin                             | adriamycin                             |
| 602 | alp                                    | alp                                    |
| 603 | biologic                               | biologic                               |
| 604 | selective_estrogen_receptor_moderators | selective_estrogen_receptor_moderators |
| 605 | taxotere                               | taxotere                               |
| 606 | raloxifene                             | raloxifene                             |
| 607 | inhibitor                              | inhibitor                              |
| 608 | injectable                             |                                        |
| 609 | taxol                                  | taxol                                  |
| 610 | vitamin_d                              | vitamin_d                              |
| 611 | exemestane                             |                                        |
| 612 | faslodex                               | faslodex                               |
| 613 | prior_anthracycline                    |                                        |
| 614 | steroidal                              |                                        |
| 615 | corticosteroid                         | corticosteroid                         |
| 616 | vinorelbine                            | vinorelbine                            |
| 617 | medicine                               | medicine                               |
| 618 | blocker                                |                                        |
| 619 | antacid                                |                                        |
| 620 | vaccine                                | vaccine                                |
| 621 | prophylactic                           | prophylactic                           |
| 622 | arimidex                               | arimidex                               |
| 623 | glucose                                |                                        |
| 624 | nitrosourea                            | nitrosourea                            |
| 625 | creatinin                              |                                        |
| 626 | levonorgestrel                         | levonorgestrel                         |
| 627 | antiestrogen                           |                                        |
| 628 | serm                                   |                                        |
| 629 | gemcitabine                            | gemcitabine                            |
| 630 | anticonvulsant                         | anticonvulsant                         |

|     |                                  |                                  |
|-----|----------------------------------|----------------------------------|
| 631 | investigational_drug             |                                  |
| 632 | acth                             | acth                             |
| 633 | experimental_drug                | experimental_drug                |
| 634 | steroidal_aromatase_inhibitor    | steroidal_aromatase_inhibitor    |
| 635 | phosphate                        | phosphate                        |
| 636 | anthracenedione                  | anthracenedione                  |
| 637 | alkaline_phosphatases            | alkaline_phosphatases            |
| 638 | tetanus_toxoid                   | tetanus_toxoid                   |
| 639 | biphosphonate                    | biphosphonate                    |
| 640 | anticoagulant                    | anticoagulant                    |
| 641 | xeloda                           | xeloda                           |
| 642 | agonist                          | agonist                          |
| 643 | nonsteroidal                     | nonsteroidal                     |
| 644 | follicle_stimulating_hormone     |                                  |
| 645 | antibody                         |                                  |
| 646 | cortisol                         |                                  |
| 647 | polysorbate                      |                                  |
| 648 | nsaid                            | nsaid                            |
| 649 | woman                            | woman                            |
| 650 | candidate                        | candidate                        |
| 651 | participant                      | participant                      |
| 652 | man                              | man                              |
| 653 | group                            | group                            |
| 654 | cohort                           | cohort                           |
| 655 | single                           | single                           |
| 656 | race                             | race                             |
| 657 | sexual_partner                   | sexual_partner                   |
| 658 | volunteer                        | volunteer                        |
| 659 | african                          | african                          |
| 660 | hispanic                         | hispanic                         |
| 661 | er                               | er                               |
| 662 | pr                               | pr                               |
| 663 | hormone_receptor                 | hormone_receptor                 |
| 664 | receptor                         | receptor                         |
| 665 | progesterone_receptor            | progesterone_receptor            |
| 666 | estrogen_receptor                | estrogen_receptor                |
| 667 | progesterone_receptor_positive   | progesterone_receptor_positive   |
| 668 | epidermal_growth_factor_receptor | epidermal_growth_factor_receptor |
| 669 | progesterone_receptors           | progesterone_receptors           |
| 670 | receptor_status                  | receptor_status                  |
| 671 | hormone_receptors                | hormone_receptors                |
| 672 | progesterone_receptor_status     | progesterone_receptor_status     |
| 673 | estrogen_receptors               |                                  |
| 674 | oestrogen_receptor               |                                  |
| 675 | neu_receptor                     | neu_receptor                     |

|     |                           |                           |
|-----|---------------------------|---------------------------|
| 676 | informed_consent          | informed_consent          |
| 677 | consent                   | consent                   |
| 678 | informed_consent_form     | informed_consent_form     |
| 679 | informed_consent_document | informed_consent_document |
| 680 | questionnaire             | questionnaire             |
| 681 | study_protocol            |                           |
| 682 | consent_form              | consent_form              |
| 683 | hipaa                     | hipaa                     |
| 684 | informed_consent_obtained | informed_consent_obtained |
| 685 | icf                       | icf                       |
| 686 | regulation                | regulation                |
| 687 | sign                      | sign                      |
| 688 | condition                 | condition                 |
| 689 | occur                     | occur                     |
| 690 | inflammatory              | inflammatory              |
| 691 | symptom                   | symptom                   |
| 692 | finding                   | finding                   |
| 693 | pain                      | pain                      |
| 694 | hot_flashes               | hot_flashes               |
| 695 | menstruate                |                           |
| 696 | hamper                    |                           |
| 697 | stiffness                 | stiffness                 |
| 698 | medical_condition         | medical_condition         |
| 699 | comorbidity               | comorbidity               |
| 700 | specimen                  | specimen                  |
| 701 | bloc                      |                           |
| 702 | treatment                 |                           |
| 703 | chemotherapy              | chemotherapy              |
| 704 | therapy                   |                           |
| 705 | surgery                   | surgery                   |
| 706 | radio_therapy             |                           |
| 707 | hormonal_therapy          | hormonal_therapy          |
| 708 | regimen                   | regimen                   |
| 709 | prior_chemotherapy        | prior_chemotherapy        |
| 710 | radiation                 | radiation                 |
| 711 | neoadjuvant               | neoadjuvant               |
| 712 | procedure                 | procedure                 |
| 713 | adjuvant_chemotherapy     | adjuvant_chemotherapy     |
| 714 | mastectomy                | mastectomy                |
| 715 | radiation_therapy         | radiation_therapy         |
| 716 | treated_with              | treated_with              |
| 717 | treat                     | treat                     |
| 718 | lumpectomy                | lumpectomy                |
| 719 | resection                 | resection                 |
| 720 | endocrine_therapy         | endocrine_therapy         |
| 721 | prior_treatment           |                           |

|     |                                |                                |
|-----|--------------------------------|--------------------------------|
| 722 | adjuvant_therapy               | adjuvant_therapy               |
| 723 | axillary_dissection            | axillary_dissection            |
| 724 | resect                         | resect                         |
| 725 | bilateral_oophorectomy         | bilateral_oophorectomy         |
| 726 | excision                       | excision                       |
| 727 | prior_therapy                  |                                |
| 728 | expression                     | expression                     |
| 729 | breast_surgery                 | breast_surgery                 |
| 730 | radiological                   | radiological                   |
| 731 | hysterectomy                   | hysterectomy                   |
| 732 | irradiate                      | irradiate                      |
| 733 | administration                 |                                |
| 734 | axillary_lymph_node_dissection | axillary_lymph_node_dissection |
| 735 | surgical_treatment             | surgical_treatment             |
| 736 | surgically                     | surgically                     |
| 737 | hormone_therapy                | hormone_therapy                |
| 738 | surgical                       |                                |
| 739 | breast_conserving_surgery      | breast_conserving_surgery      |
| 740 | oral_medication                | oral_medication                |
| 741 | immunotherapy                  | immunotherapy                  |
| 742 | systemic_therapy               | systemic_therapy               |
| 743 | chemotherapy_regimen           | chemotherapy_regimen           |
| 744 | avoid                          |                                |
| 745 | total_mastectomy               | total_mastectomy               |
| 746 | contraceptive_method           | contraceptive_method           |
| 747 | radiologic                     | radiologic                     |
| 748 | implant                        | implant                        |
| 749 | cytotoxic_chemotherapy         | cytotoxic_chemotherapy         |
| 750 | irradiation                    | irradiation                    |
| 751 | prior_radiotherapy             | prior_radiotherapy             |
| 752 | chemo                          |                                |
| 753 | surgical_excision              | surgical_excision              |
| 754 | intervention                   |                                |
| 755 | prior_chemotherapy_regimens    | prior_chemotherapy_regimens    |
| 756 | prior_radiation_therapy        | prior_radiation_therapy        |
| 757 | axillary_node_dissection       | axillary_node_dissection       |
| 758 | detect                         | detect                         |
| 759 | surgical_procedure             |                                |
| 760 | hormone_replacement_therapy    | hormone_replacement_therapy    |
| 761 | lymphadenectomy                | lymphadenectomy                |
| 762 | dissection                     | dissection                     |
| 763 | prior_surgery                  | prior_surgery                  |
| 764 | prior_hormonal_therapy         | prior_hormonal_therapy         |
| 765 | major_surgery                  |                                |
| 766 | surgical_resection             | surgical_resection             |
| 767 | tubal_ligation                 | tubal_ligation                 |

|     |                             |                             |
|-----|-----------------------------|-----------------------------|
| 768 | brachytherapy               | brachytherapy               |
| 769 | therapeutic                 | therapeutic                 |
| 770 | hrt                         | hrt                         |
| 771 | estrogen_therapy            | estrogen_therapy            |
| 772 | sterilisation               | sterilisation               |
| 773 | neoadjuvant_therapy         | neoadjuvant_therapy         |
| 774 | preoperative_chemotherapy   | preoperative_chemotherapy   |
| 775 | partial_mastectomy          | partial_mastectomy          |
| 776 | reconstruction              | reconstruction              |
| 777 | operation                   | operation                   |
| 778 | supplementation             | supplementation             |
| 779 | replacement_therapy         | replacement_therapy         |
| 780 | transfusion                 | transfusion                 |
| 781 | surgical_procedures         | surgical_procedures         |
| 782 | removal                     | removal                     |
| 783 | biologic_therapy            | biologic_therapy            |
| 784 | bilateral_mastectomy        | bilateral_mastectomy        |
| 785 | monotherapy                 | monotherapy                 |
| 786 | treated_by                  |                             |
| 787 | radiologically              | radiologically              |
| 788 | prior_adjuvant_chemotherapy | prior_adjuvant_chemotherapy |
| 789 | systemic_chemotherapy       | systemic_chemotherapy       |
| 790 | biological_therapy          |                             |
| 791 | screening_mammography       | screening_mammography       |
| 792 | cancer_treatment            | cancer_treatment            |
| 793 | vaccination                 |                             |
| 794 | modified_radical_mastectomy |                             |
| 795 | neoadjuvant_treatment       | neoadjuvant_treatment       |
| 796 | massage                     | massage                     |
| 797 | detection                   |                             |
| 798 | transplant                  |                             |
| 799 | augmentation                |                             |
| 800 | anticancer                  |                             |
| 801 | prior_radiation             |                             |
| 802 | local_therapy               | local_therapy               |
| 803 | breast_reconstruction       |                             |
| 804 | induction                   |                             |
| 805 | replacement                 |                             |
| 806 | oophorectomy                | oophorectomy                |
| 807 | treated_for                 | treated_for                 |
| 808 | breast_augmentation         |                             |
| 809 | sterilise                   |                             |
| 810 | isolation_procedure         | isolation_procedure         |
| 811 | combination_therapy         |                             |
| 812 | chemotherapy_cycle          | chemotherapy_cycle          |
| 813 | adjuvant_radiotherapy       |                             |

|     |                          |                         |
|-----|--------------------------|-------------------------|
| 814 | infiltration             | infiltration            |
| 815 | ovarian_suppression      |                         |
| 816 | axillary_lymphadenectomy |                         |
| 817 | palliation               | palliation              |
| 818 | remedy                   |                         |
| 819 | reexcision               | reexcision              |
| 820 | infusion                 |                         |
| 821 | operative_procedures     | operative_procedures    |
| 822 | investigational_therapy  | investigational_therapy |
| 823 | high_dose_chemotherapy   |                         |
| 824 | breast_cancer_treatment  | breast_cancer_treatment |
| 825 | local_excision           |                         |
| 826 | no_prior_therapy         |                         |
| 827 | cytotoxic                |                         |
| 828 | hypersensitivity         | hypersensitivity        |
| 829 | allergy                  | allergy                 |
| 830 |                          | a2                      |
| 831 |                          | a3                      |
| 832 |                          | absence                 |
| 833 |                          | acquire                 |
| 834 |                          | acquisition             |
| 835 |                          | activity                |
| 836 |                          | advise                  |
| 837 |                          | ap                      |
| 838 |                          | apply                   |
| 839 |                          | assess                  |
| 840 |                          | assessable              |
| 841 |                          | assign                  |
| 842 |                          | aware                   |
| 843 |                          | b                       |
| 844 |                          | bc                      |
| 845 |                          | bi                      |
| 846 |                          | brcapro                 |
| 847 |                          | staging                 |
| 848 |                          | carry                   |
| 849 |                          | cc                      |
| 850 |                          | review                  |
| 851 |                          | cessation               |
| 852 |                          | choose                  |
| 853 |                          | claus_model             |
| 854 |                          | co operate              |
| 855 |                          | common                  |
| 856 |                          | comparison              |
| 857 |                          | conduct                 |
| 858 |                          | contractility           |
| 859 |                          | count                   |

|     |               |
|-----|---------------|
| 860 | cr            |
| 861 | creat         |
| 862 | ctcae         |
| 863 | decision      |
| 864 | deliver       |
| 865 | desire        |
| 866 | diagnostic    |
| 867 | dipstick      |
| 868 | discontinue   |
| 869 | documentation |
| 870 | double        |
| 871 | edition       |
| 872 | embed         |
| 873 | exercise      |
| 874 | experience    |
| 875 | feature       |
| 876 | feed          |
| 877 | field         |
| 878 | fill          |
| 879 | find          |
| 880 | finish        |
| 881 | fit           |
| 882 | fna           |
| 883 | focus         |
| 884 | formula       |
| 885 | gail_model    |
| 886 | guideline     |
| 887 | herbal        |
| 888 | hold          |
| 889 | i             |
| 890 | ich           |
| 891 | ii            |
| 892 | iib           |
| 893 | iii           |
| 894 | iiib          |
| 895 | iiic          |
| 896 | index         |
| 897 | policy        |
| 898 | iv            |
| 899 | knowledge     |
| 900 | level         |
| 901 | lh            |
| 902 | lie           |
| 903 | ln            |
| 904 | m0            |
| 905 | maintain      |



|     |                |
|-----|----------------|
| 906 | make           |
| 907 | mbc            |
| 908 | mcl            |
| 909 | method         |
| 910 | nd             |
| 911 | normalize      |
| 912 | not_eligible   |
| 913 | not_specified  |
| 914 | note           |
| 915 | obtain         |
| 916 | order          |
| 917 | outline        |
| 918 | policy         |
| 919 | practice       |
| 920 | preclude       |
| 921 | preserve       |
| 922 | prognostic     |
| 923 | program        |
| 924 | protect        |
| 925 | pt             |
| 926 | ptt            |
| 927 | reach          |
| 928 | read           |
| 929 | recall         |
| 930 | receipt        |
| 931 | recovery       |
| 932 | recruit        |
| 933 | remove         |
| 934 | representative |
| 935 | reserve        |
| 936 | response       |
| 937 | satisfy        |
| 938 | select         |
| 939 | send           |
| 940 | show           |
| 941 | spread         |
| 942 | stop           |
| 943 | strategy       |
| 944 | survival       |
| 945 | t1             |
| 946 | take           |
| 947 | technique      |
| 948 | tnm            |
| 949 | treatment_plan |
| 950 | tsh            |
| 951 | understand     |

|     |            |
|-----|------------|
| 952 | understand |
| 953 | until      |
| 954 | upon       |
| 955 | ve         |
| 956 | w          |
| 957 | wash       |
| 958 | wind       |
| 959 | withdraw   |
| 960 | write      |

## Appendix 4

### Comparison between the ACCF/AHA and the Machine-powered CDEs of the Cardiovascular Disease Trials

The following tables reports the CDEs defined by the ACCF/AHA standard for the cardiovascular diseases and the corresponding CDEs mined by the machine-powered approach. The human-defined CDEs that were not mined by the proposed method are reported highlighted in yellow.

**Table 1: History and Physical Examinations**

| ACCF/AHA CDEs                     | Machine-powered CDEs |                          |      |
|-----------------------------------|----------------------|--------------------------|------|
| Chest Pain (Angina) or equivalent | Sign_or_Symptom      | chest_pain               | 160  |
|                                   | Disease_or_Syndrome  | angina                   | 897  |
| Angina Grade                      | Disease_or_Syndrome  | angina_pectoris          | 52   |
|                                   | Disease_or_Syndrome  | unstable_angina_pectoris | 26   |
|                                   | Disease_or_Syndrome  | stable_angina            | 14   |
|                                   | Disease_or_Syndrome  | angina_pectoris          | 52   |
| Heart Failure Class               | Disease_or_Syndrome  | angina                   | 897  |
|                                   | Classification       | class_i                  | 13   |
|                                   | Classification       | class_iii                | 16   |
|                                   | Classification       | nyha_class_iii           | 13   |
|                                   | Classification       | nyha                     | 17   |
|                                   | Disease_or_Syndrome  | heart_failure            | 1061 |
| Syncope                           | Sign_or_Symptom      | syncope                  | 27   |
| Date of Syncope                   | -                    | -                        | -    |
| Hypertension                      | Disease_or_Syndrome  | essential_hypertension   | 74   |
|                                   | Disease_or_Syndrome  | hypertension             | 1552 |
|                                   | Disease_or_Syndrome  | pulmonary_hypertension   | 10   |
|                                   | Disease_or_Syndrome  | secondary_hypertension   | 41   |
|                                   | Disease_or_Syndrome  | systolic_hypertension    | 16   |
|                                   | Disease_or_Syndrome  | malignant_hypertension   | 10   |

|                                         |                                     |                                     |     |
|-----------------------------------------|-------------------------------------|-------------------------------------|-----|
| Dyslipidemia                            | Disease_or_Syndrome                 | dyslipidemia                        | 26  |
| Diabetes                                | Disease_or_Syndrome                 | diabetes                            | 323 |
|                                         | Disease_or_Syndrome                 | diabetes_mellitus                   | 298 |
|                                         | Disease_or_Syndrome                 | insulin_dependent_diabetes_mellitus | 17  |
|                                         | Disease_or_Syndrome                 | insulin_dependent_diabetes          | 11  |
| Tobacco use                             | Hazardous_or_Poisonous_Substance    | tobacco                             | 13  |
|                                         | Behavior_Problem                    | smoke                               | 42  |
|                                         | Behavior_Problem                    | smoker                              | 15  |
| Chronic Lung Disease                    | Disease_or_Syndrome                 | lung_disease                        | 23  |
| Chronic Kidney Disease                  | Congenital_Abnormality              | solitary_kidney                     | 187 |
|                                         | Disease_or_Syndrome                 | kidney_disease                      | 19  |
|                                         | Disease_or_Syndrome                 | chronic_kidney_disease              | 30  |
|                                         | Disease_or_Syndrome                 | kidney_failure                      | 21  |
|                                         | Finding                             | single_kidney                       | 10  |
| Dialysis                                | Therapeutic_or_Preventive_Procedure | peritoneal_dialysis                 | 13  |
|                                         | Therapeutic_or_Preventive_Procedure | renal_dialysis                      | 13  |
|                                         | Therapeutic_or_Preventive_Procedure | dialysis                            | 234 |
|                                         | Therapeutic_or_Preventive_Procedure | hemodialysis                        | 12  |
| Illicit drug use                        | Pharmacologic_Substance             | drug_abuse                          | 143 |
| HIV infection                           | Virus                               | hiv                                 | 85  |
|                                         | Virus                               | hiv_positive                        | 14  |
|                                         | Virus                               | hiv_infection                       | 14  |
| Atrial arrhythmias                      | Pathologic_Function                 | atrial_fibrillation                 | 89  |
|                                         | Disease_or_Syndrome                 | chronic_atrial_fibrillation         | 10  |
| Paroxysmal supraventricular tachycardia | Disease_or_Syndrome                 | sustained_ventricular_tachycardia   | 116 |
|                                         | Pathologic_Function                 | ventricular_tachycardia             | 62  |
|                                         | Pathologic_Function                 | tachycardia                         | 18  |

|                                |                                  |                                   |      |
|--------------------------------|----------------------------------|-----------------------------------|------|
| Ventricular arrhythmias        | Pathologic_Function              | cardiac_arrhythmia                | 15   |
|                                | Pathologic_Function              | cardiac_arrhythmias               | 106  |
|                                | Pathologic_Function              | arrhythmias                       | 240  |
|                                | Pathologic_Function              | arrhythmia                        | 27   |
|                                | Pathologic_Function              | tachyarrhythmia                   | 10   |
|                                | Pathologic_Function              | ventricular_arrhythmia            | 23   |
| <b>Venous thromboembolism</b>  | -                                | -                                 | -    |
| Depression                     | Mental_or_Behavioral_Dysfunction | depression                        | 36   |
| Coronary artery disease        | Disease_or_Syndrome              | coronary_artery_disease           | 418  |
|                                | Disease_or_Syndrome              | left_main_coronary_artery_disease | 78   |
|                                | Disease_or_Syndrome              | coronary_artery_stenosis          | 37   |
| <b>Cerebral artery disease</b> | -                                | -                                 | -    |
| Peripheral artery disease      | Disease_or_Syndrome              | peripheral_vascular_disease       | 31   |
| Aorta disease                  | Disease_or_Syndrome              | aortic_stenosis                   | 33   |
|                                | Disease_or_Syndrome              | abdominal_aortic_aneurysm         | 17   |
| Renal artery disease           | Disease_or_Syndrome              | renal_artery_stenosis             | 191  |
| Myocardial infarction          | Disease_or_Syndrome              | myocardial_infarction             | 1706 |
|                                | Disease_or_Syndrome              | acute_myocardial_infarction       | 492  |
|                                | Disease_or_Syndrome              | myocardial_ischemia               | 120  |
|                                | Finding                          | recent_myocardial_infarction      | 43   |
| Date of myocardial infarction  | Disease_or_Syndrome              | myocardial_infarction             | 1706 |
| Sudden cardiac arrest          | Pathologic_Function              | cardiac_arrest                    | 678  |
|                                | Sign_or_Symptom                  | arrest                            | 18   |
| Date of cardiac arrest         | Pathologic_Function              | cardiac_arrest                    | 678  |
| Heart failure                  | Disease_or_Syndrome              | heart_failure                     | 1061 |
|                                | Disease_or_Syndrome              | chronic_heart_failure             | 133  |
|                                | Disease_or_Syndrome              | chronic_congestive_heart_failure  | 10   |

|                          |                         |                                  |     |
|--------------------------|-------------------------|----------------------------------|-----|
|                          | Disease_or_Syndrome     | congestive_heart_failure         | 261 |
| Family History           | Family_Group            | family_history_of                | 24  |
|                          | Family_Group            | family                           | 20  |
|                          | Family_Group            | family_member                    | 16  |
|                          | Family_Group            | parent                           | 13  |
| Sudden cardiac death     | Disease_or_Syndrome     | death                            | 25  |
| Systolic blood pressure  | Finding                 | sitting_systolic_blood_pressure  | 111 |
| Diastolic blood pressure | Finding                 | sitting_diastolic_blood_pressure | 275 |
| Height                   | Clinical_Attribute      | height                           | 13  |
| Weight                   | Clinical_Attribute      | weight                           | 15  |
| Waist                    | Body_Location_or_Region | waist                            | 66  |
| Heart rate               | -                       | -                                | -   |

**Summary:**

37 CDEs defined by ACCF/AHA

33 CDEs mined by the Machine-powered approach

Coverage: 33/37 = 89.2%

**Table 2: Laboratory Results**

| ACCF/AHA CDEs     | Machine-powered CDEs          |                   |     |
|-------------------|-------------------------------|-------------------|-----|
| Total cholesterol | Laboratory_Procedure          | total_cholesterol | 55  |
| LDL cholesterol   | Biologically_Active_Substance | ldl_cholesterol   | 43  |
|                   | Biologically_Active_Substance | ldl               | 117 |
| HDL cholesterol   | Biologically_Active_Substance | hdl_cholesterol   | 15  |
|                   | Biologically_Active_Substance | hdl               | 53  |
|                   | Biologically_Active_Substance | cholesterol       | 34  |
| Triglycerides     | Biologically_Active_Substance | triglycerides     | 116 |
| Fast blood sugar  | -                             | -                 | -   |

|                       |                               |                        |     |
|-----------------------|-------------------------------|------------------------|-----|
| Creatinine            | Biologically_Active_Substance | creatinine             | 604 |
|                       | Laboratory_or_Test_Result     | serum_creatinine_level | 43  |
|                       | Laboratory_or_Test_Result     | creatinine_level       | 58  |
| <b>BUN</b>            | -                             | -                      | -   |
| Sodium                | Pathologic_Function           | sodium_depletion       | 17  |
| Hemoglobin            | Biologically_Active_Substance | hemoglobin             | 151 |
| <b>Hemoglobin A1C</b> | -                             | -                      | -   |
| Hematocrit            | Laboratory_or_Test_Result     | hematocrit             | 68  |

**Summary:**

11 CDEs defined by ACCF/AHA

8 CDEs mined by the Machine-powered approach

**Coverage: 8/11 = 72.7%**

**Table 3: Diagnostic and Therapeutic Procedures**

| ACCF/AHA CDEs      | Machine-powered CDEs |                      |     |
|--------------------|----------------------|----------------------|-----|
| Cardiac diagnostic | Diagnostic_Procedure | ecg                  | 954 |
|                    | Diagnostic_Procedure | echo                 | 152 |
|                    | Diagnostic_Procedure | echocardiogram       | 48  |
|                    | Diagnostic_Procedure | echocardiography     | 136 |
|                    | Diagnostic_Procedure | echocardiographic    | 10  |
|                    | Diagnostic_Procedure | electrocardiogram    | 26  |
|                    | Diagnostic_Procedure | angiogram            | 47  |
|                    | Diagnostic_Procedure | angiography          | 188 |
|                    | Diagnostic_Procedure | ct_angiography       | 10  |
|                    | Diagnostic_Procedure | angiographic         | 304 |
|                    | Diagnostic_Procedure | angiographically     | 25  |
|                    | Diagnostic_Procedure | coronary_angiography | 314 |

|                                |                           |                                    |     |
|--------------------------------|---------------------------|------------------------------------|-----|
|                                | Diagnostic_Procedure      | scan(General)                      | 12  |
|                                | Diagnostic_Procedure      | ct_scan                            | 26  |
|                                | Diagnostic_Procedure      | mri_scan                           | 13  |
|                                | Diagnostic_Procedure      | mri                                | 191 |
|                                | Diagnostic_Procedure      | diagnostic_catheterization         | 14  |
|                                | Diagnostic_Procedure      | clinical_diagnosis(General)        | 32  |
|                                | Diagnostic_Procedure      | diagnosed(General)                 | 128 |
|                                | Diagnostic_Procedure      | cardiac_biopsy                     | 92  |
|                                | Diagnostic_Procedure      | ekg                                | 12  |
|                                | Diagnostic_Procedure      | gfr                                | 129 |
|                                | Diagnostic_Procedure      | asa                                | 39  |
|                                | Diagnostic_Procedure      | ct                                 | 31  |
|                                | Diagnostic_Procedure      | spect                              | 42  |
|                                | Diagnostic_Procedure      | gault                              | 22  |
|                                | Diagnostic_Procedure      | qtc                                | 10  |
| Date of cardia diagnosis       | -                         | -                                  | -   |
| Diagnostic Procedure Results   | -                         | -                                  | -   |
| Ejection faction (Quantity)    | Laboratory_or_Test_Result | lvef                               | 811 |
|                                | Laboratory_or_Test_Result | left_ventricular_ejection_fraction | 262 |
| Ejection faction (Quality)     | Laboratory_or_Test_Result | lvef                               | 811 |
| Left ventricle size (Quantity) | -                         | -                                  | -   |
| Left ventricle size (Quality)  | -                         | -                                  | -   |
| Left atrium size (Quantity)    | -                         | -                                  | -   |
| Aortic valve area              | Disease_or_Syndrome       | aortic_stenosis                    | 33  |
| Aortic valve regurgitation     | -                         | -                                  | -   |
| Mitral valve area              | Disease_or_Syndrome       | mitral_valve_stenosis              | 11  |
| Mitral valve regurgitation     | Disease_or_Syndrome       | mitral_regurgitation               | 11  |



|                                    |                                     |                                   |      |
|------------------------------------|-------------------------------------|-----------------------------------|------|
| Stress test result                 | Diagnostic_Procedure                | exercise_stress_test              | 11   |
|                                    | Diagnostic_Procedure                | stress_test                       | 77   |
| Myocardium ischemic amount         | Pathologic_Function                 | ischemic                          | 630  |
| Coronary calcium score             | Organ_or_Tissue_Function            | calcification                     | 13   |
| Coronary artery disease vessels    | -                                   | -                                 | -    |
| Left coronary artery stenosis      | Disease_or_Syndrome                 | left_main_coronary_artery_disease | 78   |
| Proximal LAD coronary stenosis     | -                                   | -                                 | -    |
| Third degree AV block              | Disease_or_Syndrome                 | third_degree_heart_block          | 77   |
| Left bundle branch block           | Disease_or_Syndrome                 | left_bundle_branch_block          | 109  |
| Intraventricular conduction delay* | Organism_Attribute                  | qrs                               | 130  |
|                                    | Organism_Attribute                  | qrs_duration                      | 82   |
| Therapeutic Procedure              | Therapeutic_or_Preventive_Procedure | treatment(General)                | 2702 |
|                                    | Therapeutic_or_Preventive_Procedure | resuscitation                     | 42   |
|                                    | Therapeutic_or_Preventive_Procedure | implantation                      | 325  |
|                                    | Therapeutic_or_Preventive_Procedure | transplant                        | 27   |
|                                    | Therapeutic_or_Preventive_Procedure | heart_transplant                  | 179  |
| Date of Therapeutic Procedure      | Temporal Concept                    | -                                 | -    |
| Implanted Device                   | Medical_Device                      | implantable_defibrillator         | 18   |
|                                    | Medical_Device                      | defibrillator                     | 209  |
|                                    | Medical_Device                      | biventricular_pacemaker           | 18   |
|                                    | Medical_Device                      | permanent_pacemaker               | 15   |
|                                    | Medical_Device                      | pacemaker                         | 355  |

**Summary:**

24 CDEs defined by ACCF/AHA

16 CDEs mined by the Machine-powered approach

**Coverage: 16/24 = 66.7%**

**Table 4: Pharmacological Therapies**

| ACCF/AHA CDEs                  | Machine-powered CDEs                |                                |     |
|--------------------------------|-------------------------------------|--------------------------------|-----|
| Pharmacological Therapy        | Pharmacologic_Substance             | investigational_drug (general) | 703 |
|                                | Pharmacologic_Substance             | medication (general)           | 378 |
|                                | Therapeutic_or_Preventive_Procedure | drug_therapy                   | 23  |
|                                | Therapeutic_or_Preventive_Procedure | medical_therapy                | 38  |
| Aspirin                        | Pharmacologic_Substance             | aspirin                        | 102 |
| P2Y12 blocker                  | Receptor                            | p2y12                          | 64  |
| Nonsteroidal anti-inflammatory | Pharmacologic_Substance             | nsaid                          | 21  |
| Steroid                        | Pharmacologic_Substance             | steroid                        | 20  |
| Cyclo-oxygenase 2 inhibitor    | -                                   | -                              | -   |
| Anticoagulant                  | Therapeutic_or_Preventive_Procedure | anticoagulant_therapy          | 67  |
|                                | Therapeutic_or_Preventive_Procedure | anticoagulation_therapy        | 12  |
|                                | Therapeutic_or_Preventive_Procedure | anticoagulation                | 15  |
|                                | Pharmacologic_Substance             | anticoagulant                  | 12  |
| Alpha blocker                  | Pharmacologic_Substance             | alpha_blocker                  | 68  |
| Beta blocker                   | Pharmacologic_Substance             | beta_blocker                   | 42  |
| ACE inhibitor                  | Pharmacologic_Substance             | ace_inhibitor                  | 46  |
| ARB                            | Pharmacologic_Substance             | arb                            | 75  |
| Calcium channel blocker        | Pharmacologic_Substance             | calcium_channel_blocker        | 28  |
| Antiarrhythmics                | Pharmacologic_Substance             | antiarrhythmic_drug            | 74  |
|                                | Pharmacologic_Substance             | antiarrhythmic                 | 110 |
| Direct rennin inhibitors       | -                                   | -                              | -   |
| Nitrate                        | Inorganic_Chemical                  | Nitrate                        | 12  |
| Statin                         | Pharmacologic_Substance             | statin                         | 240 |
| Nonstatin antilipidemic        | -                                   | -                              | -   |
| Insulin                        | Pharmacologic_Substance             | insulin                        | 295 |

|                                 |                         |                        |     |
|---------------------------------|-------------------------|------------------------|-----|
| Noninsulin hypoglycemic         | Disease_or_Syndrome     | hypothyroidism         | 12  |
| Diuretic                        | Pharmacologic_Substance | diuretic               | 134 |
|                                 | Pharmacologic_Substance | diuretics              | 13  |
| Aldosterone receptor antagonist | Receptor                | aldosterone_receptor   | 16  |
|                                 | Pharmacologic_Substance | aldosterone_antagonist | 76  |

**Summary:**

21 CDEs defined by ACCF/AHA

18 CDEs mined by the Machine-powered approach

Coverage: 18/21 = 85.7%

**Table 5: Outcomes**

| ACCF/AHA CDEs | Machine-powered CDEs |       |    |
|---------------|----------------------|-------|----|
| Death         | Disease_or_Syndrome  | death | 25 |
| Date of Death | -                    | -     | -  |

**Summary:**

2 CDEs defined by ACCF/AHA

1 CDE mined by the Machine-powered approach

Coverage: 1/2 = 50.0%
